# Supplementary material for: Long-term change in alcohol-consumption status and variations in fibrinogen levels: the coronary artery risk development in young adults (CARDIA) study
Source: PubMed Central journal article supplement — BMJ Open. 2013 Jul 11;3(7):e002944. doi: 10.1136/bmjopen-2013-002944 (PMC3710982; doi:10.1136/bmjopen-2013-002944), 2013-07-11
Supplement: bmjopen-2013-002944.draft_revisions.pdf [file bmjopen-2013-002944.draft_revisions.pdf]

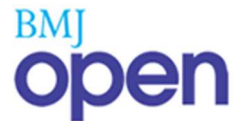

**Long-Term Change in Alcohol Consumption Status and Variations in Serum Fibrinogen Levels: The Coronary Artery Risk Development in Young Adults (CARDIA) Study**

|                                 |                                                                                                                                                                                                                                                                                                                         |
|---------------------------------|-------------------------------------------------------------------------------------------------------------------------------------------------------------------------------------------------------------------------------------------------------------------------------------------------------------------------|
| Journal:                        | <i>BMJ Open</i>                                                                                                                                                                                                                                                                                                         |
| Manuscript ID:                  | bmjopen-2013-002944                                                                                                                                                                                                                                                                                                     |
| Article Type:                   | Research                                                                                                                                                                                                                                                                                                                |
| Date Submitted by the Author:   | 25-Mar-2013                                                                                                                                                                                                                                                                                                             |
| Complete List of Authors:       | Okwuosa, Tochi; Wayne State University, Internal Medicine, Division of Cardiology<br>Klein, Oana; University of California, San Francisco,<br>Chan, Cheeling; Northwestern University,<br>Schreiner, Pamela; University of Minnesota,<br>Liu, Kiang; Northwestern University,<br>Green, David; Northwestern University, |
| <b>Primary Subject Heading</b>: | Epidemiology                                                                                                                                                                                                                                                                                                            |
| Secondary Subject Heading:      | Cardiovascular medicine                                                                                                                                                                                                                                                                                                 |
| Keywords:                       | Cardiac Epidemiology < CARDIOLOGY, Thromboembolism < CARDIOLOGY, EPIDEMIOLOGY, PREVENTIVE MEDICINE                                                                                                                                                                                                                      |
|                                 |                                                                                                                                                                                                                                                                                                                         |

SCHOLARONE™  
Manuscripts

1  
2  
3 **Long-Term Change in Alcohol Consumption Status and Variations in Serum Fibrinogen Levels:**  
4  
5  
6 **The Coronary Artery Risk Development in Young Adults (CARDIA) Study**  
7  
8  
9

10 **Okwuosa: Fibrinogen Changes with Alcohol Consumption Status**  
11

12  
13  
14  
15 **Authors:** Tochi M. Okwuosa, DO, FACC<sup>1</sup>; Oana Klein, MD, MS<sup>2</sup>; Cheeling Chan, MS<sup>3</sup>; Pamela Schreiner,  
16  
17 PhD<sup>4</sup>; Kiang Liu, PhD<sup>5</sup>; David Green, MD, PhD<sup>6</sup>.  
18  
19

20  
21  
22 <sup>1</sup> Assistant Professor, Director Preventive Cardiology, Wayne State University School of Medicine,  
23  
24 Department of Medicine, Division of Cardiology, Detroit Michigan  
25  
26

27  
28 <sup>2</sup> Assistant Clinical Professor, Department of Medicine, University of California San Francisco,  
29  
30 Department of Medicine, San Francisco, California  
31  
32

33  
34 <sup>3</sup> Statistical Analyst/ Programmer, Northwestern University Feinberg School of Medicine, Departments  
35  
36 of Preventive Medicine and Medicine, Chicago, Illinois  
37  
38

39  
40 <sup>4</sup> Professor and Director of Graduate Studies, University of Minnesota School of Public Health, Division of  
41  
42 Epidemiology & Community Health, Minneapolis, Minnesota  
43  
44

45  
46 <sup>5</sup> Professor in Preventive Medicine and Medicine-General Internal Medicine and Geriatrics,  
47  
48 Northwestern University Feinberg School of Medicine, Departments of Preventive Medicine and  
49  
50 Medicine, Chicago, Illinois  
51

52  
53 <sup>6</sup> Professor Emeritus in Medicine-Hematology/Oncology, Northwestern University Feinberg School of  
54  
55 Medicine, Department of Medicine, Division of Hematology/Oncology, Chicago, Illinois  
56  
57  
58  
59  
60

1  
2  
3 **Correspondence:**  
4

5 Tochukwu E. M. Okwuosa, D.O., FACC  
6

7  
8 Assistant Professor of Medicine and Cardiology  
9

10 Wayne State University – Harper University Hospital  
11

12 3990 John R – 4 Hudson, Detroit, MI 48201  
13

14 Telephone: 313.745.2620; Fax: 313.745.8643  
15

16  
17 Email: [tokwuosa@med.wayne.edu](mailto:tokwuosa@med.wayne.edu)  
18  
19  
20  
21  
22  
23  
24  
25  
26  
27  
28  
29  
30  
31  
32  
33  
34  
35  
36  
37  
38  
39  
40  
41  
42  
43  
44  
45  
46  
47  
48  
49  
50  
51  
52  
53  
54  
55  
56  
57  
58  
59  
60

**ABSTRACT**

**Objective:** To examine long-term associations between change in alcohol consumption status and cessation of alcohol use, and blood fibrinogen levels in a large, young, biracial cohort.

**Design:** ANCOVA models were used to analyze participants within the CARDIA cohort who had fibrinogen and alcohol use data at year 7 (1992-93; ages 25-37) and year 20 examinations.

**Setting:** Four urban U.S. cities.

**Patients:** 2548 men and women within the CARDIA cohort.

**Interventions:** None

**Main Outcome Measures:** 13-year changes in alcohol use related to changes in fibrinogen.

**Results:** Over 13 years, mean fibrinogen increased by 71mg/dL vs. 70mg/dL ( $p=NS$ ) in black men (BM) vs. white men (WM), and 78mg/dL vs. 68mg/dL ( $p<0.05$ ) in black women (BW) vs. white women (WW), respectively. Compared with never-drinkers, there were smaller longitudinal increases in fibrinogen for BM, BW and WW (but larger increase in WM) who became or stayed drinkers, after multivariable adjustment. For BM, WM and WW, fibrinogen increased the most among persons who quit drinking over 13 years [ $p<0.001$  for WM (fibrinogen increase = 86.5 (7.1) [mean (SE)]), compared with never-drinkers (fibrinogen increase = 53.1 (5.4)].

**Conclusions:** In this young cohort, compared to the participants who never drank, those who became/stayed drinkers had smaller increases, while those who quit drinking had the highest increase in fibrinogen over 13 years of follow-up. The results provide a novel insight into the mechanism for established protective effect of moderate alcohol intake on CVD outcomes.

1  
2  
3 **Key Words:** Fibrinogen, Alcohol, Cardiovascular Diseases, Risk factors, Young adults  
4  
5  
6  
7  
8  
9  
10  
11  
12  
13  
14  
15  
16  
17  
18  
19  
20  
21  
22  
23  
24  
25  
26  
27  
28  
29  
30  
31  
32  
33  
34  
35  
36  
37  
38  
39  
40  
41  
42  
43  
44  
45  
46  
47  
48  
49  
50  
51  
52  
53  
54  
55  
56  
57  
58  
59  
60

For peer review only

## INTRODUCTION

Numerous studies have linked moderate alcohol consumption with lower cardiovascular disease (CVD) morbidity and mortality.(1-3) Conversely, fibrinogen – the precursor of fibrin, a cofactor for platelet aggregation, and a major determinant of blood viscosity and atherogenesis – directly and independently correlates with CVD, as well as CVD risk factors.(4, 5) Many cross-sectional and prospective studies have found lower serum fibrinogen levels among alcohol consumers. (4, 6) Accordingly, fibrinogen levels decline with lifestyle interventions such as smoking cessation, exercise and moderate alcohol consumption.(4, 5, 7)

Alcohol is suggested to be causally related to lower risk of CVD through changes in lipids and hemostatic/inflammatory factors, such as fibrinogen.(1, 3, 6, 8, 9) This observed relationship between alcohol consumption and CVD follows a non-linear J-shaped curve, thus suggesting hazards to excessive alcohol consumption, and to complete abstinence.(1, 6, 10) In addition, there is some data in the literature linking moderate increase in alcohol consumption status to decreased risk of CVD and diabetes;(11, 12) and better health among moderate drinkers compared with alcohol quitters after acute myocardial infarction (MI).(13) Fibrinogen, lipids and other inflammatory and hemostatic factors implicated in CVD also appear to follow a J-shaped distribution in their relationship with alcohol consumption.(6, 9, 14) Nonetheless, there are very sparse data describing the relationship between long-term change in alcohol consumption status and any of these factors.(10) Even less is known about the influence of cessation of alcohol use on these factors.

We report 13-year longitudinal associations between change in alcohol consumption status and cessation of alcohol use, and variations in fibrinogen levels among a biracial group of young adult participants from the large CARDIA (Coronary Artery Risk Development in Young Adults Study) cohort. Findings from this study of young adults might provide some insight into the established protective effect of moderate alcohol intake on CVD outcomes. We stratified our findings by sex and race.

## **METHODS**

**Study participants:** CARDIA is an ongoing multicenter prospective cohort study designed to investigate the evolution of CVD risk factors and subclinical atherosclerosis in young adults. Inclusion/exclusion criteria, baseline characteristics, and details of the study design, have been described elsewhere.<sup>(15)</sup> Briefly, in 1985-1986 the cohort enrolled 5115 black and white adults aged 18-30 years recruited from four urban U.S. areas (Birmingham, Alabama; Oakland, California; Chicago, Illinois and Minneapolis, Minnesota). Participants were balanced by age, sex, race, and education at baseline. Persons with coronary heart disease [CHD] (n=6), persons with non-fasting glucose and missing data for triglycerides and low density lipoprotein (LDL) cholesterol (n=312), and persons missing other covariates of interest (n=105) were excluded. The final cohort for analysis included 2548 participants. The institutional review boards at all the study sites approved the study protocol, and written informed consent was obtained from all study participants.

Fibrinogen was measured at year 7 ([Y7] our study baseline), and again at year 20 ([Y20] follow-up in this study). Of the 3844 participants examined at baseline<sub>07</sub>, 804 persons were lost to follow-up. We included 2520 non-pregnant women and men with fibrinogen measurements, alcohol data and other covariates of interest at both baseline and follow-up.

**Covariates ascertainment:** Blood pressure, cholesterol, height, weight, waist circumference, smoking, and physical activity were measured in each examination using a standardized protocol.<sup>18</sup> Interviewer-administered questionnaires were used to obtain information on age, race, socioeconomic measures, diabetes history, cigarette smoking status, family history and medication use.<sup>(15)</sup>

**Alcohol consumption:** Alcohol use was assessed via interviewer-administered questionnaire for different types of alcoholic beverages (wine, beer, and liquor). Current alcohol drinkers were defined as

1  
2  
3 individuals who drank any alcoholic beverages in the past year. Otherwise, individuals were classified as  
4  
5 non-drinkers.  
6

7  
8 Change in alcohol consumption status over 13 years was categorized according to dichotomized  
9  
10 alcohol consumption groupings (non-drinker, current drinker) at Y7 and Y20 and four mutually exclusive  
11  
12 groups to reflect long-term changes in alcohol consumption status were defined: continued non-drinker  
13  
14 (individuals persistently in the “non-drinker” category at both Y7 and Y20, referent), became drinker  
15  
16 (individuals in the “non-drinker” category at Y7 but in the “current” category at Y20), stayed drinker  
17  
18 (individuals persistently in the “current” category at both Y7 and Y20), and quit drinking (individuals in  
19  
20 the “current” category at Y7 but in the “non-drinker” category in Y20).  
21  
22

23  
24 We used categorized change in alcohol use rather than a numeric value of change in alcohol  
25  
26 consumption over time for 2 reasons: first, per the U.S. Department of Health and Human Services,  
27  
28 alcohol use was categorized as none, moderate, and at-risk based on established thresholds; second, the  
29  
30 distribution of changes in alcohol use (as numeric values) over time in the general population is skewed  
31  
32 and not normally distributed. As such, changes in alcohol use cannot be analyzed using parametric  
33  
34 statistical tests.  
35  
36

37  
38 **Fibrinogen measurement:** Each participant had blood samples drawn after an 8-hour fast, between 7  
39  
40 a.m. and 10 a.m. Within 10 minutes of collection, repeated inversion was used to mix the samples,  
41  
42 which were then spun in a refrigerated centrifuge at 4°C for 20 minutes. Within 90 minutes, the  
43  
44 samples were stored at -70°C for a maximum of 4 months. In 2003, automated nephelometry was used  
45  
46 to assay samples stored since Y7 (1992-93), as previously described.<sup>(16)</sup> This method was also used at  
47  
48 Y20.  
49  
50

51  
52 **Statistical analysis:** All analyses were performed by sex/race strata, with 2-sided  $p < 0.05$  considered  
53  
54 statistically significant. Baseline and follow-up alcohol consumption status and pairwise differences in  
55  
56 covariates by sex/race groups were estimated using t-tests, chi-square tests, and Fisher’s exact tests, as  
57  
58  
59  
60



1  
2  
3 appropriate. ANCOVA models were used to relate changes in status of alcohol use (predictor variable)  
4 to changes in mean fibrinogen levels (outcome variable) over 13 years, with adjustments for covariates.  
5  
6  
7 Model 1 adjusted for baseline (year 7) age and fibrinogen level. Model 2 adjusted for baseline age,  
8 fibrinogen level, family history of heart disease, education, physical activity and traditional CVD risk  
9 factors (including hypertension, diabetes, dyslipidemia, hypertriglyceridemia, obesity and number of  
10 cigarettes/day); 13-year change in physical activity score, as well as follow-up statuses of traditional CVD  
11 risk factors as listed. We stratified our findings by sex/race groups because the CARDIA study group was  
12 designed to be balanced by age, sex, race and education when recruited at baseline. Analyses were  
13 conducted with SAS statistical software version 9.2 (SAS Institute Inc, Cary, NC).  
14  
15  
16  
17  
18  
19  
20  
21  
22  
23  
24  
25  
26  
27  
28  
29  
30  
31  
32  
33  
34  
35  
36  
37  
38  
39  
40  
41  
42  
43  
44  
45  
46  
47  
48  
49  
50  
51  
52  
53  
54  
55  
56  
57  
58  
59  
60

## RESULTS

**Baseline Characteristics:** Baseline characteristics for this sample have previously been described. In brief, we included 2548 participants (55% women, 43% black), mean age of 32.2 years (range 25-37 years) at study baseline. Supplemental Table 1 shows summary statistics for key variables at baseline and follow-up. Over 13 years, mean fibrinogen increased by 71mg/dL vs. 70mg/dL ( $p=NS$ ) in black men compared with white men, and 78mg/dL vs. 68mg/dL ( $p<0.05$ ) in black women compared with white women, respectively.

The prevalence of alcohol use at baseline and year 20 was higher among white men and women relative to black men and women (both  $p<0.01$ ). Compared to study baseline, the prevalence of alcohol use at year 20 was higher among white men and women, but lower among black men and women by follow-up 13 years later (Supplemental Table 1).

**Multivariable Changes in Fibrinogen Levels in Relation to Changes in Alcohol Consumption Status:** The alcohol drinking status for most participants remained stable through the years (Table 1). More individuals remained non-drinker ( $N = 829$ ) or stayed drinker ( $N = 1088$ ), while fewer persons changed their drinking status through the years ( $N = 309$  for those who became drinker, and 294 for those who quit drinking). After adjustments for various covariates (models 1 and 2 in Figure), changes in alcohol consumption status from study baseline to follow-up were inversely associated with changes in mean fibrinogen levels during the same time period. As such, becoming or staying a drinker (for both models) was associated with smaller mean increase in 13-year follow-up fibrinogen levels compared with never-drinkers. This held true among black men and women, but was particularly strongest in white women (all  $p<0.001$  for both models among white women). An exception was white men, whose fibrinogen

1  
2  
3 increased more in those who became or stayed drinkers and increased the least among those who never  
4  
5 drank alcohol over the 13 years.  
6  
7

8 For all alcohol use patterns studied, quitting alcohol use was associated with the *largest* mean  
9  
10 increase in fibrinogen by the 13-year follow-up ( $p < 0.001$  for white men, compared with never-drinkers).  
11  
12 For black women, change in fibrinogen was essentially the same for those who quit drinking relative to  
13  
14 those who never drank alcohol over the years.  
15  
16

17 Our findings remained the same when at-risk drinkers – defined as  $\geq 3$  drinks on the day of  
18  
19 maximum intake in the past month or  $\geq 8$  drinks per week for women; and  $\geq 4$  drinks on the day they  
20  
21 drank the most in the past month or  $\geq 15$  drinks per week for men(17) – were excluded from the analysis  
22  
23 (data not shown). Our findings also did not change when follow-up CVD risk factors were excluded from  
24  
25 Model 2.  
26  
27  
28  
29  
30  
31  
32  
33  
34  
35  
36  
37  
38  
39  
40  
41  
42  
43  
44  
45  
46  
47  
48  
49  
50  
51  
52  
53  
54  
55  
56  
57  
58  
59  
60

## DISCUSSION

For the first time, we directly examined associations between changes in long-term alcohol consumption status and alcohol cessation, and changes in serum fibrinogen levels in a large, young population of black and white men and women. Overall we observed that fibrinogen rose less in persons who became drinkers or remained drinkers, and interestingly, increased more in persons who quit drinking. This pattern held for three of the sex/race groups in our study, even after adjusting for study baseline age, fibrinogen levels, family history of heart disease, education, physical activity and traditional CVD risk factors; 13-year changes in physical activity, as well as follow-up statuses of traditional CVD risk factors (as detailed in model 2 in the Figure). However, for white men, continued non-drinker status was not associated with a greater rise in fibrinogen.

Fibrinogen has shown significant independent positive associations with CHD, CVD and their risk factors – including age, smoking history, physical activity, body mass index, total and LDL cholesterol and systolic blood pressure,(4) (5) while the opposite is true for alcohol consumption. In fact, alcohol consumed in moderate quantities is inversely correlated with risk factors and mortality for CHD and CVD (including stroke).(2, 3)

We found that overall, persons who continued to use and those who initiated alcohol consumption during the 13 years of follow-up had smaller changes in fibrinogen levels relative to those who never consumed alcohol. Several prospective and cross-sectional studies have shown significant inverse associations between alcohol consumption and serum fibrinogen levels.(4, 6) Indeed, moderate alcohol consumption has been associated with platelet inhibition similar to that observed with aspirin use.(18) However, while some studies have examined the relationship between very short-term alcohol intake and changes in fibrinogen levels in a limited number of patients,(8, 19) very sparse data exist that have examined associations between long-term alcohol intake status and variations in fibrinogen levels

1  
2  
3 in a large population of participants. In addition, the youth of our study population contributes  
4 significant information to existing literature because it evaluates alcohol effects on CVD risk, with  
5 minimal confounding. Our study suggests that alcohol can still modulate CVD risk even in young adults,  
6 an important finding which agrees with benefits to CVD risk modulation beginning early in life.  
7  
8  
9  
10  
11

12 An interesting and important observation from our study is that in all sex/race groups, among  
13 those who quit drinking over the years, fibrinogen levels increased to values higher than observed for  
14 never-drinkers and the rest of the drinking groups. Indeed, several studies have observed a J-shaped  
15 curve in the relationship between alcohol and CVD such that lower alcohol consumption was associated  
16 with reduced CVD, while the reverse was true for higher quantities of alcohol consumed.(1, 2, 20) A  
17 study of patients immediately post MI showed better health among patients with moderately increased  
18 alcohol intake relative to quitters.(13) Nonetheless, no study to our knowledge has investigated the  
19 effects of quitting alcohol consumption on inflammatory/thrombotic markers or CVD risk factors in  
20 general. Fibrinogen is a marker of platelet aggregation and vascular thrombosis. In acute, short-term  
21 human and experimental models, discontinuation of alcohol use has been associated with rebound  
22 platelet aggregation.(14, 18, 21)  
23  
24  
25  
26  
27  
28  
29  
30  
31  
32  
33  
34  
35  
36

37 Unlike the rest of the sex/race groups, white men who became drinkers and those who stayed  
38 drinkers through the years had larger increases in fibrinogen levels relative to never-drinkers.  
39  
40 Prospective and cross-sectional studies have shown the observed J-curve pattern to beneficial effects of  
41 alcohol in whites, but not in blacks; and moderate alcohol drinking to be associated with reduced CVD  
42 mortality in whites, but not blacks.(22, 23) This finding in our study is unexplained, and requires further  
43 exploration.  
44  
45  
46  
47  
48  
49  
50

51 The strength of our study lies in the longitudinal nature of our assessment with a relatively long  
52 follow-up period of 13 years, the large size of the study, the youth of the study participants (with few  
53 residual confounding factors at baseline), and the sex/racial makeup of the cohort. Our study findings  
54  
55  
56  
57  
58  
59  
60

1  
2  
3 are particularly novel in that in examining the associations between alcohol consumption and fibrinogen  
4  
5 changes in a large population of black and white men and women, we consolidated many years of  
6  
7 alcohol use into each of the alcohol status categories; while examining their effects on variations in  
8  
9 fibrinogen levels within each group. Thus, our study provides an important addition to the literature  
10  
11 with respect to the long-term relationship between alcohol use and fibrinogen as a marker of CVD.  
12  
13

14  
15 Limitations include the relatively wide range of alcohol intake levels included among persons  
16  
17 classified as drinkers. Nonetheless, our findings remained the same after dropping at-risk levels. We  
18  
19 caution that this analysis does not specifically measure all other potential conditions associated with  
20  
21 elevated fibrinogen levels, although on average the CARDIA cohort was recruited to be a relatively  
22  
23 healthy sample at baseline. Furthermore, some participants were excluded from our analysis due to  
24  
25 missing data or loss to follow-up. Findings were unchanged when imputation analysis was performed in  
26  
27 a prior study by our group which examined associations between fibrinogen and CV risk factors in the  
28  
29 same population.  
30  
31  
32

33  
34  
35 **Conclusion:** In this young cohort of black and white men and women with minimal baseline  
36  
37 confounding factors, increase in fibrinogen was overall smaller among drinkers and larger among those  
38  
39 who quit drinking, compared with those who remained alcohol-free for 13 years. These results need to  
40  
41 be confirmed in other populations. Our study provides some valuable insight into the mechanism of  
42  
43 established protective effect of moderate alcohol intake on CVD outcomes, and concurs with benefits to  
44  
45 CVD risk modulation beginning early in life. Translation of our findings to associations with CHD/CVD  
46  
47 events would be of great interest.  
48  
49  
50

#### 51 52 53 **Sources of Funding and Acknowledgements** 54 55 56 57 58 59 60

1  
2  
3 This work was supported by grant HL-43758 and contracts NO1-HC-48049 and NO1-HC-95095 from the  
4  
5 National Heart, Lung, and Blood Institute (NHLBI) and grant AG032136 from the National Institute on  
6  
7 Aging, National Institutes of Health. The funders had no role in the design and conduct of the study;  
8  
9 collection, management, analysis, and interpretation of the data; and preparation, review, or approval  
10  
11 of the manuscript, except as required of all studies supported by the NHLBI. The authors had full access  
12  
13 to all of the data in the study and take responsibility for the integrity of the data and the accuracy of the  
14  
15 data analysis.  
16  
17  
18  
19  
20  
21  
22  
23

24 **Conflicts of Interest:** None  
25  
26  
27

28 **Data Sharing Statement:** No additional data  
29  
30  
31  
32  
33  
34  
35  
36  
37  
38  
39  
40  
41  
42  
43  
44  
45  
46  
47  
48  
49  
50  
51  
52  
53  
54  
55  
56  
57  
58  
59  
60

## Bibliography

1. Costanzo S, Di Castelnuovo A, Donati MB, et al. Alcohol consumption and mortality in patients with cardiovascular disease: a meta-analysis. *J Am Coll Cardiol*. 2010;55(13):1339-47.
2. Di Castelnuovo A, Costanzo S, Bagnardi V, et al. Alcohol dosing and total mortality in men and women: an updated meta-analysis of 34 prospective studies. *Arch Intern Med*. 2006;166(22):2437-45.
3. Brien SE, Ronksley PE, Turner BJ, et al. Effect of alcohol consumption on biological markers associated with risk of coronary heart disease: systematic review and meta-analysis of interventional studies. *BMJ*. 2011;342:d636.
4. Kaptoge S, White IR, Thompson SG, et al. Fibrinogen Studies Collaboration. Associations of plasma fibrinogen levels with established cardiovascular disease risk factors, inflammatory markers, and other characteristics: individual participant meta-analysis of 154,211 adults in 31 prospective studies: the fibrinogen studies collaboration. *Am J Epidemiol*. 2007;166(8):867-79.
5. Danesh J, Lewington S, Thompson SG, et al. Fibrinogen Studies Collaboration. Plasma fibrinogen level and the risk of major cardiovascular diseases and nonvascular mortality: an individual participant meta-analysis. *JAMA*. 2005;294(14):1799-809.
6. Rimm EB, Williams P, Fosher K, et al. Moderate alcohol intake and lower risk of coronary heart disease: meta-analysis of effects on lipids and haemostatic factors. *BMJ*. 1999;319(7224):1523-8.
7. Chainani-Wu N, Weidner G, Purnell DM, et al. Changes in emerging cardiac biomarkers after an intensive lifestyle intervention. *Am J Cardiol*. 2011;108(4):498-507.
8. Hansen AS, Marckmann P, Dragsted LO, et al. Effect of red wine and red grape extract on blood lipids, haemostatic factors, and other risk factors for cardiovascular disease. *Eur J Clin Nutr*. 2005;59(3):449-55.
9. Imhof A, Woodward M, Doering A, et al. Overall alcohol intake, beer, wine, and systemic markers of inflammation in western Europe: results from three MONICA samples (Augsburg, Glasgow, Lille). *Eur Heart J*. 2004;25(23):2092-100.
10. Kloner RA, Rezkalla SH. To drink or not to drink? That is the question. *Circulation*. 2007;116(11):1306-17.
11. Sesso HD, Stampfer MJ, Rosner B, et al. Seven-year changes in alcohol consumption and subsequent risk of cardiovascular disease in men. *Arch Intern Med*. 2000;160(17):2605-12.
12. Joosten MM, Chiuve SE, Mukamal KJ, et al. Changes in alcohol consumption and subsequent risk of type 2 diabetes in men. *Diabetes*. 2011;60(1):74-9.
13. Carter MD, Lee JH, Buchanan DM, et al. Comparison of outcomes among moderate alcohol drinkers before acute myocardial infarction to effect of continued versus discontinuing alcohol intake after the infarct. *Am J Cardiol*. 2010;105(12):1651-4.
14. Puddey IB, Rakic V, Dimmitt SB, et al. Influence of pattern of drinking on cardiovascular disease and cardiovascular risk factors--a review. *Addiction*. 1999;94(5):649-63.
15. Friedman GD, Cutter GR, Donahue RP, et al. CARDIA: study design, recruitment, and some characteristics of the examined subjects. *J Clin Epidemiol*. 1988;41(11):1105-16.
16. Reiner AP, Carty CL, Carlson CS, et al. Association between patterns of nucleotide variation across the three fibrinogen genes and plasma fibrinogen levels: the Coronary Artery Risk Development in Young Adults (CARDIA) study. *J Thromb Haemost*. 2006;4(6):1279-87.
17. Helping Patients Who Drink Too Much: A Clinician's Guide. In: Services USDoHaH, editor. Rockville, MD2005.
18. Renaud SC, Ruf JC. Effects of alcohol on platelet functions. *Clin Chim Acta*. 1996;246(1-2):77-89.
19. Dimmitt SB, Rakic V, Puddey IB, et al. The effects of alcohol on coagulation and fibrinolytic factors: a controlled trial. *Blood Coagul Fibrinolysis*. 1998;9(1):39-45.



- 1
- 2
- 3
- 4 20. Corrao G, Bagnardi V, Zambon A, et al. A meta-analysis of alcohol consumption and the risk of
- 5 15 diseases. *Prev Med*. 2004;38(5):613-9.
- 6 21. Ruf JC. Alcohol, wine and platelet function. *Biol Res*. 2004;37(2):209-15. Epub 2004/10/01.
- 7 22. Kerr WC, Greenfield TK, Bond J, et al. Racial and ethnic differences in all-cause mortality risk
- 8 according to alcohol consumption patterns in the national alcohol surveys. *Am J Epidemiol*.
- 9 2011;174(7):769-78.
- 10 23. Sempos CT, Rehm J, Wu T, et al. Average volume of alcohol consumption and all-cause mortality
- 11 in African Americans: the NHEFS cohort. *Alcohol Clin Exp Res*. 2003;27(1):88-92.
- 12
- 13
- 14
- 15
- 16
- 17
- 18
- 19
- 20
- 21
- 22
- 23
- 24
- 25
- 26
- 27
- 28
- 29
- 30
- 31
- 32
- 33
- 34
- 35
- 36
- 37
- 38
- 39
- 40
- 41
- 42
- 43
- 44
- 45
- 46
- 47
- 48
- 49
- 50
- 51
- 52
- 53
- 54
- 55
- 56
- 57
- 58
- 59
- 60

For peer review only

1  
2  
3  
4  
5  
6  
7  
8  
9  
10  
11  
12  
13  
14  
15  
16  
17  
18  
19  
20  
21  
22  
23  
24  
25  
26  
27  
28  
29  
30  
31  
32  
33  
34  
35  
36  
37  
38  
39  
40  
41  
42  
43  
44  
45  
46  
47  
48  
49  
50  
51  
52  
53  
54  
55  
56  
57  
58  
59  
60

**Figure Legend: Adjusted Mean Increase in Fibrinogen in Relation to Changes in Alcohol Use  
over 13 Years by Sex- Race: the CARDIA Study, 1992-2006**

For peer review only

**Table 1: Adjusted Mean Changes in Fibrinogen in relation to Changes in Alcohol Consumption Status over 13 Years by Sex- Race: the CARDIA Study, 1992-2006<sup>¶</sup>**

| Change in risk factors      | Change in fibrinogen (mg/dL) |             |                         |                     |                          |                          |                     |                         |                         |                     |                          |                         |
|-----------------------------|------------------------------|-------------|-------------------------|---------------------|--------------------------|--------------------------|---------------------|-------------------------|-------------------------|---------------------|--------------------------|-------------------------|
|                             | Men                          |             |                         |                     |                          |                          | Women               |                         |                         |                     |                          |                         |
|                             | Blacks, Mean Δ (SE)          |             |                         | Whites, Mean Δ (SE) |                          |                          | Blacks, Mean Δ (SE) |                         |                         | Whites, Mean Δ (SE) |                          |                         |
|                             | N                            | Model 1     | Model 2                 | N                   | Model 1                  | Model 2                  | N                   | Model 1                 | Model 2 <sup>§</sup>    | N                   | Model 1                  | Model 2 <sup>§</sup>    |
| Alcohol use                 |                              |             |                         |                     |                          |                          |                     |                         |                         |                     |                          |                         |
| Continued non-drinker (ref) | 124                          | 71.9 (6.0)  | 69.9 (6.1)              | 139                 | 57.8 (5.4)               | 56.2 (5.5)               | 338                 | 84.0 (4.4)              | 84.0 (4.6)              | 228                 | 82.2 (4.9)               | 82.7 (4.9)              |
| Became drinker              | 39                           | 66.3 (10.8) | 68.4 (10.7)             | 84                  | 61.5 (7.0)               | 61.5 (7.0)               | 78                  | 62.1 (9.2) <sup>c</sup> | 62.8 (9.2) <sup>c</sup> | 108                 | 54.3 (7.0) <sup>a</sup>  | 53.6 (6.9) <sup>a</sup> |
| Stayed drinker              | 191                          | 67.7 (4.9)  | 68.4 (4.9)              | 415                 | 72.3 (3.1) <sup>c*</sup> | 73.3 (3.2) <sup>b*</sup> | 149                 | 69.9 (6.7)              | 69.9 (6.9)              | 333                 | 55.4 (4.0) <sup>a</sup>  | 56.2 (4.1) <sup>a</sup> |
| Quit drinking               | 65                           | 89.9 (8.3)  | 90.6 (8.2) <sup>c</sup> | 78                  | 90.1 (7.2) <sup>a</sup>  | 87.5 (7.3) <sup>a</sup>  | 86                  | 93.0 (8.8)              | 82.3 (8.8)              | 65                  | 103.4 (9.0) <sup>c</sup> | 98.4 (9.1)              |

<sup>¶</sup>Each risk factor represents a separate ANCOVA model. Ref=referent. SE=standard error.

Model 1: adjusted for baseline (age, and fibrinogen level). Model 2: all variables in model 1 and additionally adjusted for family history of heart disease, education, baseline (physical activity, number of cigarettes/d, and all other risk factors shown in table simultaneously). Changes in fibrinogen or risk factors were defined by changes over 13 years from baseline to year 20 (year 20 – year 7).

<sup>§</sup> Similar results were observed with addition of birth control pill or hormone use in the models.

\* $P < 0.05$ , † $P < 0.01$ , ‡ $P < 0.001$  compared to Blacks between same model within gender.

<sup>a</sup> $P < 0.001$ , <sup>b</sup> $P < 0.01$ , <sup>c</sup> $P < 0.05$  compared with the referent category of risk factor within sex/race.

1  
2  
3  
4  
5  
6  
7  
8  
9  
10  
11  
12  
13  
14  
15  
16  
17  
18  
19  
20  
21  
22  
23  
24  
25  
26  
27  
28  
29  
30  
31  
32  
33  
34  
35  
36  
37  
38  
39  
40  
41  
42  
43  
44  
45  
46  
47  
48  
49

**Supplemental Table 1. Baseline\*\*and Year 20 (Follow-up) Characteristics by Sex- Race: the CARDIA Study, 1992-2006**

| Variables                        | Men           |                | Women         |                |
|----------------------------------|---------------|----------------|---------------|----------------|
|                                  | Black (N=428) | Whites (N=726) | Black (N=656) | Whites (N=738) |
| <b>Baseline (Year 7)</b>         |               |                |               |                |
| Age, y                           | 31.6 (3.7)    | 32.7 (3.3)‡    | 31.6 (3.8)    | 32.7 (3.3)‡    |
| Highest education attained, y    | 14.2 (2.3)    | 16.1 (2.6)‡    | 14.6 (2.1)    | 16.2 (2.4)‡    |
| Family history of CVD, %         | 39.7          | 32.0†          | 43.3          | 33.3‡          |
| Diastolic BP, mmHg               | 72.3 (9.8)    | 70.3 (9.0)‡    | 69.9 (10.3)   | 64.8 (8.0)‡    |
| LDL cholesterol, mg/dL           | 111.8 (35.6)  | 113.7 (32.4)   | 104.5 (29.3)  | 101.9 (27.6)   |
| HDL cholesterol, mg/dL           | 50.8 (14.2)   | 45.7 (10.9)‡   | 55.1 (13.7)   | 56.5 (12.5)*   |
| Glucose, ug/dL                   | 94.1 (22.7)   | 93.3 (10.8)    | 89.1 (15.3)   | 88.4 (10.2)    |
| Triglycerides, mg/dL             | 81.6 (51.4)   | 97.2 (59.3)‡   | 67.0 (37.8)   | 69.7 (39.1)    |
| Physical activity, exercise unit | 477.6 (345.1) | 414.2 (263.5)‡ | 231.5 (215.7) | 309.5 (229.2)‡ |
| BMI, kg/m <sup>2</sup>           | 27.1 (5.2)    | 25.8 (4.0)‡    | 28.7 (7.3)    | 24.4 (5.1)‡    |
| Fibrinogen, mg/dL                | 328.3 (72.7)  | 305.1 (56.8)‡  | 371.0 (80.9)  | 324.5 (67.0)‡  |
| Current alcohol use, %           | 61.4          | 68.9†          | 36.3          | 54.2‡          |
| Antihypertensive medication, %   | 2.1           | 1.1            | 2.9           | 0.4‡           |

| Variables                      | Men           |                | Women         |                |
|--------------------------------|---------------|----------------|---------------|----------------|
|                                | Black (N=428) | Whites (N=726) | Black (N=656) | Whites (N=738) |
| Lipid-lowering medication, %   | 0.2           | 0.0            | 0.3           | 0.5            |
| Current smoking, %             | 31.5          | 18.2‡          | 25.6          | 15.7‡          |
| Obesity, %                     | 24.1          | 12.8‡          | 36.9          | 12.7‡          |
| Hypertension, %                | 6.1           | 4.1            | 6.7           | 0.8‡           |
| Diabetes, %                    | 1.6           | 0.7            | 1.1           | 0.5            |
| Hypertriglyceridemia, %        | 4.0           | 6.5            | 0.9           | 1.4            |
| Dyslipidemia, %                | 39.9          | 46.6*          | 46.8          | 39.6†          |
| <b>Year 20</b>                 |               |                |               |                |
| Current alcohol use, %         | 54.9          | 69.7‡          | 34.9          | 60.1‡          |
| Antihypertensive medication, % | 19.2          | 11.7‡          | 28.5          | 6.4‡           |
| Lipid-lowering medication, %   | 7.9           | 13.4†          | 5.5           | 4.2            |
| Current smoking, %             | 27.1          | 13.9‡          | 20.0          | 11.1‡          |
| Obesity, %                     | 43.9          | 26.3‡          | 57.8          | 24.9‡          |
| Hypertension, %                | 25.0          | 14.9‡          | 34.9          | 8.3‡           |
| Diabetes, %                    | 10.5          | 4.4‡           | 10.1          | 2.6‡           |
| Hypertriglyceridemia, %        | 6.8           | 16.8‡          | 2.9           | 5.0*           |
| Dyslipidemia, %                | 52.8          | 58.5           | 48.3          | 37.3‡          |

| Variables                                 | Men           |                | Women         |                |
|-------------------------------------------|---------------|----------------|---------------|----------------|
|                                           | Black (N=428) | Whites (N=726) | Black (N=656) | Whites (N=738) |
| <b>13-y Difference (year 20 – year 7)</b> |               |                |               |                |
| Diastolic BP, mmHg                        | 3.0 (11.7)    | 0.8 (9.4)‡     | 5.6 (12.3)    | 2.4 (9.1)‡     |
| LDL cholesterol, mg/dL                    | 0.1 (33.1)    | 1.1 (32.2)     | 3.3 (25.9)    | 4.3 (24.7)     |
| HDL cholesterol, mg/dL                    | -1.1 (11.3)   | 1.0 (9.8)‡     | 2.1 (12.0)    | 5.1 (12.3)‡    |
| Glucose, $\mu$ g/dL                       | 9.6 (29.5)    | 7.6 (16.9)     | 11.3 (26.6)   | 5.1 (13.7)‡    |
| Triglycerides, mg/dL                      | 24.1 (57.4)   | 29.9 (63.3)    | 21.8 (42.7)   | 24.9 (48.0)    |
| Physical activity, exercise unit          | -51.5 (345.2) | -1.3 (260.1)†  | -9.9 (248.4)  | 27.1 (235.9)†  |
| BMI, kg/m <sup>2</sup>                    | 2.9 (3.6)     | 2.5 (4.9)      | 3.8 (4.5)     | 2.7 (4.1)‡     |
| Fibrinogen, mg/dL                         | 71.0 (71.2)   | 69.5 (67.8)    | 78.1 (86.2)   | 67.8 (77.1)*   |

\* $P < 0.05$ , † $P < 0.01$ , ‡ $P < 0.001$  compared with blacks between the value of the characteristic within gender.

§ Data are given as means (SD) unless otherwise specified.

|| Abbreviations: CVD, cardiovascular disease (included heart attack and stroke); BP, blood pressure; HDL, high-density lipoprotein; LDL, low-density lipoprotein; BMI, body mass index

# Definitions: Current smoking - at least 5 cigarettes per week almost every week for at least 3 months, Diabetes - fasting glucose  $\geq 126$  mg/dL or taking diabetic medication; hypertension - systolic blood pressure  $\geq 140$  mmHg, diastolic blood pressure (DBP)  $\geq 90$  mmHg, or taking anti-hypertensive medication; dyslipidemia - low HDL cholesterol ( $< 40$  mg/dL [men] or  $< 50$  mg/dL [women]) and/or high LDL cholesterol ( $> 130$  mg/dL) or taking lipid-lowering medication, hypertriglyceridemia - triglycerides  $> 200$  mg/dL; obesity was defined as BMI  $\geq 30$  kg/m<sup>2</sup>.

\*\* Baseline refers to year 7 of the CARDIA cohort

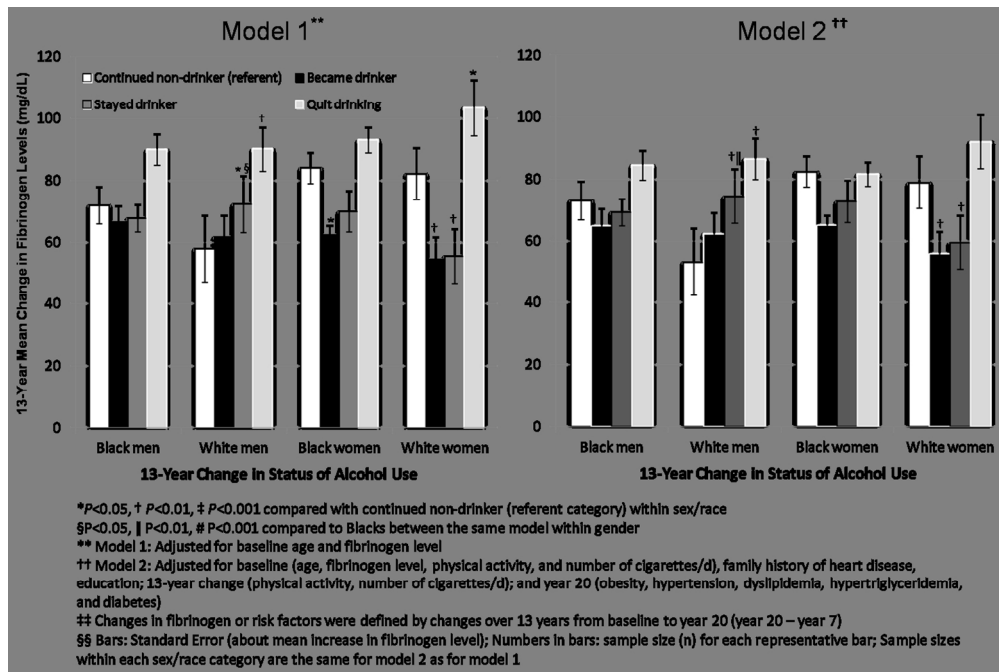

Figure Legend: Adjusted Mean Increase in Fibrinogen in Relation to Changes in Alcohol Use over 13 Years by Sex- Race: the CARDIA Study, 1992-2006  
 249x166mm (150 x 150 DPI)

1  
2  
3 **Long-Term Change in Alcohol Consumption Status and Variations in Serum Fibrinogen Levels: The**  
4 **Coronary Artery Risk Development in Young Adults (CARDIA) Study**  
5  
6  
7

8 **Okwuosa: Fibrinogen Changes with Alcohol Consumption Status**  
9

10  
11  
12 **Article Summary**  
13

14  
15  
16  
17  
18 **Article Focus:**  
19

- 20
- 21 • To gain some insight into the established protective effect of moderate alcohol intake on CVD  
22 outcomes.  
23
  - 24 • To determine the 13-year longitudinal associations between change in alcohol consumption  
25 status and cessation of alcohol use.  
26
  - 27 • To determine variations in fibrinogen levels among a biracial group of young adult participants  
28 from the large CARDIA (Coronary Artery Risk Development in Young Adults Study) cohort.  
29  
30  
31

32  
33  
34 **Key Messages:**  
35

- 36
- 37 • In this young cohort of black and white men and women with minimal baseline confounding  
38 factors, compared to the participants who never drank, those who became/stayed drinkers had  
39 smaller increases; while those who quit drinking had the highest increase in fibrinogen over 13  
40 years of follow-up.  
41  
42  
43  
44  
45

46  
47 **Strengths/Limitations:**  
48

49 The strength of our study lies in the longitudinal nature of our assessment with a relatively long  
50 follow-up period of 13 years, the large size of the study, the youth of the study participants (with few  
51 residual confounding factors at baseline), and the sex/racial makeup of the cohort. Our study findings  
52 are particularly novel in that in examining the associations between alcohol consumption and fibrinogen  
53 changes in a large population of black and white men and women, we consolidated many years of  
54  
55  
56  
57  
58  
59  
60



1  
2  
3 alcohol use into each of the alcohol status categories; while examining their effects on variations in  
4 fibrinogen levels within each group. Thus, our study provides an important addition to the literature  
5 with respect to the long-term relationship between alcohol use and fibrinogen as a marker of CVD.  
6  
7  
8

9  
10 Limitations include the relatively wide range of alcohol intake levels included among persons  
11 classified as drinkers. Nonetheless, our findings remained the same after dropping at-risk levels. We  
12 caution that this analysis does not specifically measure all other potential conditions associated with  
13 elevated fibrinogen levels, although on average the CARDIA cohort was recruited to be a relatively  
14 healthy sample at baseline. Furthermore, some participants were excluded from our analysis due to  
15 missing data or loss to follow-up. Findings were unchanged when imputation analysis was performed in  
16 a prior study by our group which examined associations between fibrinogen and CV risk factors in the  
17 same population.  
18  
19  
20  
21  
22  
23  
24  
25  
26  
27  
28  
29  
30  
31  
32  
33  
34  
35  
36  
37  
38  
39  
40  
41  
42  
43  
44  
45  
46  
47  
48  
49  
50  
51  
52  
53  
54  
55  
56  
57  
58  
59  
60

STROBE Statement—Checklist of items that should be included in reports of *cohort studies*

|                              | Item No | Recommendation                                                                                                                                                                                                                                                                                                                                                                                                |
|------------------------------|---------|---------------------------------------------------------------------------------------------------------------------------------------------------------------------------------------------------------------------------------------------------------------------------------------------------------------------------------------------------------------------------------------------------------------|
| <b>Title and abstract</b>    | 1       | (a) Indicate the study's design with a commonly used term in the title or the abstract<br>(b) Provide in the abstract an informative and balanced summary of what was done and what was found                                                                                                                                                                                                                 |
| <b>Introduction</b>          |         |                                                                                                                                                                                                                                                                                                                                                                                                               |
| Background/rationale         | 2       | Explain the scientific background and rationale for the investigation being reported                                                                                                                                                                                                                                                                                                                          |
| Objectives                   | 3       | State specific objectives, including any prespecified hypotheses                                                                                                                                                                                                                                                                                                                                              |
| <b>Methods</b>               |         |                                                                                                                                                                                                                                                                                                                                                                                                               |
| Study design                 | 4       | Present key elements of study design early in the paper                                                                                                                                                                                                                                                                                                                                                       |
| Setting                      | 5       | Describe the setting, locations, and relevant dates, including periods of recruitment, exposure, follow-up, and data collection                                                                                                                                                                                                                                                                               |
| Participants                 | 6       | (a) Give the eligibility criteria, and the sources and methods of selection of participants. Describe methods of follow-up<br>(b) For matched studies, give matching criteria and number of exposed and unexposed                                                                                                                                                                                             |
| Variables                    | 7       | Clearly define all outcomes, exposures, predictors, potential confounders, and effect modifiers. Give diagnostic criteria, if applicable                                                                                                                                                                                                                                                                      |
| Data sources/<br>measurement | 8*      | For each variable of interest, give sources of data and details of methods of assessment (measurement). Describe comparability of assessment methods if there is more than one group                                                                                                                                                                                                                          |
| Bias                         | 9       | Describe any efforts to address potential sources of bias                                                                                                                                                                                                                                                                                                                                                     |
| Study size                   | 10      | Explain how the study size was arrived at                                                                                                                                                                                                                                                                                                                                                                     |
| Quantitative variables       | 11      | Explain how quantitative variables were handled in the analyses. If applicable, describe which groupings were chosen and why                                                                                                                                                                                                                                                                                  |
| Statistical methods          | 12      | (a) Describe all statistical methods, including those used to control for confounding<br>(b) Describe any methods used to examine subgroups and interactions<br>(c) Explain how missing data were addressed<br>(d) If applicable, explain how loss to follow-up was addressed<br>(e) Describe any sensitivity analyses                                                                                        |
| <b>Results</b>               |         |                                                                                                                                                                                                                                                                                                                                                                                                               |
| Participants                 | 13*     | (a) Report numbers of individuals at each stage of study—eg numbers potentially eligible, examined for eligibility, confirmed eligible, included in the study, completing follow-up, and analysed<br>(b) Give reasons for non-participation at each stage<br>(c) Consider use of a flow diagram                                                                                                               |
| Descriptive data             | 14*     | (a) Give characteristics of study participants (eg demographic, clinical, social) and information on exposures and potential confounders<br>(b) Indicate number of participants with missing data for each variable of interest<br>(c) Summarise follow-up time (eg, average and total amount)                                                                                                                |
| Outcome data                 | 15*     | Report numbers of outcome events or summary measures over time                                                                                                                                                                                                                                                                                                                                                |
| Main results                 | 16      | (a) Give unadjusted estimates and, if applicable, confounder-adjusted estimates and their precision (eg, 95% confidence interval). Make clear which confounders were adjusted for and why they were included<br>(b) Report category boundaries when continuous variables were categorized<br>(c) If relevant, consider translating estimates of relative risk into absolute risk for a meaningful time period |

|                          |    |                                                                                                                                                                            |
|--------------------------|----|----------------------------------------------------------------------------------------------------------------------------------------------------------------------------|
| Other analyses           | 17 | Report other analyses done—eg analyses of subgroups and interactions, and sensitivity analyses                                                                             |
| <b>Discussion</b>        |    |                                                                                                                                                                            |
| Key results              | 18 | Summarise key results with reference to study objectives                                                                                                                   |
| Limitations              | 19 | Discuss limitations of the study, taking into account sources of potential bias or imprecision. Discuss both direction and magnitude of any potential bias                 |
| Interpretation           | 20 | Give a cautious overall interpretation of results considering objectives, limitations, multiplicity of analyses, results from similar studies, and other relevant evidence |
| Generalisability         | 21 | Discuss the generalisability (external validity) of the study results                                                                                                      |
| <b>Other information</b> |    |                                                                                                                                                                            |
| Funding                  | 22 | Give the source of funding and the role of the funders for the present study and, if applicable, for the original study on which the present article is based              |

\*Give information separately for exposed and unexposed groups.

**Note:** An Explanation and Elaboration article discusses each checklist item and gives methodological background and published examples of transparent reporting. The STROBE checklist is best used in conjunction with this article (freely available on the Web sites of PLoS Medicine at <http://www.plosmedicine.org/>, Annals of Internal Medicine at <http://www.annals.org/>, and Epidemiology at <http://www.epidem.com/>). Information on the STROBE Initiative is available at <http://www.strobe-statement.org>.



**Long-Term Change in Alcohol Consumption Status and Variations in Fibrinogen Levels: The Coronary Artery Risk Development in Young Adults (CARDIA) Study**

|                                 |                                                                                                                                                                                                                                                                                                                         |
|---------------------------------|-------------------------------------------------------------------------------------------------------------------------------------------------------------------------------------------------------------------------------------------------------------------------------------------------------------------------|
| Journal:                        | <i>BMJ Open</i>                                                                                                                                                                                                                                                                                                         |
| Manuscript ID:                  | bmjopen-2013-002944.R1                                                                                                                                                                                                                                                                                                  |
| Article Type:                   | Research                                                                                                                                                                                                                                                                                                                |
| Date Submitted by the Author:   | 08-May-2013                                                                                                                                                                                                                                                                                                             |
| Complete List of Authors:       | Okwuosa, Tochi; Wayne State University, Internal Medicine, Division of Cardiology<br>Klein, Oana; University of California, San Francisco,<br>Chan, Cheeling; Northwestern University,<br>Schreiner, Pamela; University of Minnesota,<br>Liu, Kiang; Northwestern University,<br>Green, David; Northwestern University, |
| <b>Primary Subject Heading</b>: | Epidemiology                                                                                                                                                                                                                                                                                                            |
| Secondary Subject Heading:      | Cardiovascular medicine                                                                                                                                                                                                                                                                                                 |
| Keywords:                       | Cardiac Epidemiology < CARDIOLOGY, Thromboembolism < CARDIOLOGY, EPIDEMIOLOGY, PREVENTIVE MEDICINE                                                                                                                                                                                                                      |
|                                 |                                                                                                                                                                                                                                                                                                                         |

SCHOLARONE™  
Manuscripts

1  
2  
3 **Long-Term Change in Alcohol Consumption Status and Variations in Fibrinogen Levels:**  
4  
5  
6 **The Coronary Artery Risk Development in Young Adults (CARDIA) Study**  
7  
8  
9

10 **Okwuosa: Fibrinogen Changes with Alcohol Consumption Status**  
11

12  
13  
14  
15 **Authors:** Tochi M. Okwuosa, DO, FACC<sup>1</sup>; Oana Klein, MD, MS<sup>2</sup>; Cheeling Chan, MS<sup>3</sup>; Pamela Schreiner,  
16  
17 PhD<sup>4</sup>; Kiang Liu, PhD<sup>5</sup>; David Green, MD, PhD<sup>6</sup>.  
18  
19

20  
21  
22 <sup>1</sup> Assistant Professor, Director Preventive Cardiology, Wayne State University School of Medicine,  
23  
24 Department of Medicine, Division of Cardiology, Detroit Michigan  
25  
26

27  
28 <sup>2</sup> Assistant Clinical Professor, Department of Medicine, University of California San Francisco,  
29  
30 Department of Medicine, San Francisco, California  
31  
32

33  
34 <sup>3</sup> Statistical Analyst/ Programmer, Northwestern University Feinberg School of Medicine, Departments  
35  
36 of Preventive Medicine and Medicine, Chicago, Illinois  
37  
38

39  
40 <sup>4</sup> Professor and Director of Graduate Studies, University of Minnesota School of Public Health, Division of  
41  
42 Epidemiology & Community Health, Minneapolis, Minnesota  
43  
44

45  
46 <sup>5</sup> Professor in Preventive Medicine and Medicine-General Internal Medicine and Geriatrics,  
47  
48 Northwestern University Feinberg School of Medicine, Departments of Preventive Medicine and  
49  
50 Medicine, Chicago, Illinois  
51

52  
53 <sup>6</sup> Professor Emeritus in Medicine-Hematology/Oncology, Northwestern University Feinberg School of  
54  
55 Medicine, Department of Medicine, Division of Hematology/Oncology, Chicago, Illinois  
56  
57  
58  
59  
60

1  
2  
3 **Correspondence:**  
4

5 Tochukwu E. M. Okwuosa, D.O., FACC  
6

7  
8 Assistant Professor of Medicine and Cardiology  
9

10 Wayne State University – Harper University Hospital  
11

12 3990 John R – 4 Hudson, Detroit, MI 48201  
13

14 Telephone: 313.745.2620; Fax: 313.745.8643  
15

16  
17 Email: [tokwuosa@med.wayne.edu](mailto:tokwuosa@med.wayne.edu)  
18  
19  
20  
21  
22  
23  
24  
25  
26  
27  
28  
29  
30  
31  
32  
33  
34  
35  
36  
37  
38  
39  
40  
41  
42  
43  
44  
45  
46  
47  
48  
49  
50  
51  
52  
53  
54  
55  
56  
57  
58  
59  
60

## Article Summary

### Article Focus:

- To gain some insight into the established protective effect of moderate alcohol intake on CVD outcomes.
- To determine the 13-year longitudinal associations between change in alcohol consumption status and cessation of alcohol use.
- To determine variations in fibrinogen levels among a biracial group of young adult participants from the large CARDIA (Coronary Artery Risk Development in Young Adults Study) cohort.

### Key Messages:

- In this young cohort of black and white men and women with minimal baseline confounding factors, compared to the participants who never drank, those who became/stayed drinkers had smaller increases; while those who quit drinking had the highest increase in fibrinogen over 13 years of follow-up.

### Strengths/Limitations:

The strength of our study lies in the longitudinal nature of our assessment with a relatively long follow-up period of 13 years, the large size of the study, the youth of the study participants (with few residual confounding factors at baseline), and the sex/racial makeup of the cohort. Our study findings are particularly novel in that in examining the associations between alcohol consumption and fibrinogen changes in a large population of black and white men and women, we consolidated many years of alcohol use into each of the alcohol status categories; while examining their effects on variations in fibrinogen levels within each group. Thus, our study provides an important addition to the literature with respect to the long-term relationship between alcohol use and fibrinogen as a marker of CVD.

Limitations include the relatively wide range of alcohol intake levels included among persons classified as drinkers. Nonetheless, our findings remained the same after dropping at-risk levels. We

1  
2  
3  
4  
5  
6  
7  
8  
9  
10  
11  
12  
13  
14  
15  
16  
17  
18  
19  
20  
21  
22  
23  
24  
25  
26  
27  
28  
29  
30  
31  
32  
33  
34  
35  
36  
37  
38  
39  
40  
41  
42  
43  
44  
45  
46  
47  
48  
49  
50  
51  
52  
53  
54  
55  
56  
57  
58  
59  
60

caution that this analysis does not specifically measure all other potential conditions associated with elevated fibrinogen levels, although on average the CARDIA cohort was recruited to be a relatively healthy sample at baseline. Furthermore, some participants were excluded from our analysis due to missing data or loss to follow-up. Findings were unchanged when imputation analysis was performed in a prior study by our group which examined associations between fibrinogen and CV risk factors in the same population.

## **ABSTRACT**

**Objective:** To examine long-term associations between change in alcohol consumption status and cessation of alcohol use, and fibrinogen levels in a large, young, biracial cohort.

**Design:** ANCOVA models were used to analyze participants within the CARDIA cohort who had fibrinogen and alcohol use data at year 7 (1992-93; ages 25-37) and year 20 examinations.

**Setting:** Four urban U.S. cities.

**Patients:** 2520 men and women within the CARDIA cohort.

**Main Outcome Measures:** 13-year changes in alcohol use related to changes in fibrinogen.

**Results:** Over 13 years, mean fibrinogen increased by 71mg/dL vs. 70mg/dL ( $p=NS$ ) in black men (BM) vs. white men (WM), and 78mg/dL vs. 68mg/dL ( $p<0.05$ ) in black women (BW) vs. white women (WW), respectively. Compared with never-drinkers, there were smaller longitudinal increases in fibrinogen for BM, BW and WW (but larger increase in WM) who became or stayed drinkers, after multivariable adjustment. For BM, WM and WW, fibrinogen increased the most among persons who quit drinking



1  
2  
3 over 13 years [ $p < 0.001$  for WM (fibrinogen increase = 86.5 (7.1) [mean (SE)]), compared with never-  
4  
5 drinkers (fibrinogen increase = 53.1 (5.4)).  
6  
7

8  
9 **Conclusions:** In this young cohort, compared to the participants who never drank, those who  
10  
11 became/stayed drinkers had smaller increases, while those who quit drinking had the highest increase in  
12  
13 fibrinogen over 13 years of follow-up. The results provide a novel insight into the mechanism for  
14  
15 established protective effect of moderate alcohol intake on CVD outcomes.  
16  
17

18  
19  
20  
21  
22 **Key Words:** Fibrinogen, Alcohol, Cardiovascular Diseases, Risk factors, Young adults  
23  
24  
25  
26  
27  
28  
29  
30  
31  
32  
33  
34  
35  
36  
37  
38  
39  
40  
41  
42  
43  
44  
45  
46  
47  
48  
49  
50  
51  
52  
53  
54  
55  
56  
57  
58  
59  
60

## INTRODUCTION

Numerous studies have linked moderate alcohol consumption with lower cardiovascular disease (CVD) morbidity and mortality.(1-3) Conversely, fibrinogen – the precursor of fibrin, a cofactor for platelet aggregation, and a major determinant of blood viscosity and atherogenesis – directly and independently correlates with CVD, as well as CVD risk factors.(4, 5) Many cross-sectional and prospective studies have found lower fibrinogen levels among alcohol consumers. (4, 6) Accordingly, fibrinogen levels decline with lifestyle interventions such as smoking cessation, exercise and moderate alcohol consumption.(4, 5, 7)

Alcohol is suggested to be causally related to lower risk of CVD through changes in lipids and hemostatic/inflammatory factors, such as fibrinogen.(1, 3, 6, 8, 9) This observed relationship between alcohol consumption and CVD follows a non-linear J-shaped curve, thus suggesting hazards to excessive alcohol consumption, and to complete abstinence.(1, 6, 10) In addition, there is some data in the literature linking moderate increase in alcohol consumption status to decreased risk of CVD and diabetes;(11, 12) and better health among moderate drinkers compared with alcohol quitters after acute myocardial infarction (MI).(13) Fibrinogen, lipids and other inflammatory and hemostatic factors implicated in CVD also appear to follow a J-shaped distribution in their relationship with alcohol consumption.(6, 9, 14) Nonetheless, there are very sparse data describing the relationship between long-term change in alcohol consumption status and any of these factors.(10) Even less is known about the influence of cessation of alcohol use on these factors.

We report 13-year longitudinal associations between change in alcohol consumption status and cessation of alcohol use, and variations in fibrinogen levels among a biracial group of young adult participants from the large CARDIA (Coronary Artery Risk Development in Young Adults Study) cohort. Findings from this study of young adults might provide some insight into the established protective effect of moderate alcohol intake on CVD outcomes. We stratified our findings by sex and race.

## **METHODS**

**Study participants:** CARDIA is an ongoing multicenter prospective cohort study designed to investigate the evolution of CVD risk factors and subclinical atherosclerosis in young adults. Inclusion/exclusion criteria, baseline characteristics, and details of the study design, have been described elsewhere.<sup>(15)</sup> Briefly, in 1985-1986 the cohort enrolled 5115 black and white adults aged 18-30 years recruited from four urban U.S. areas (Birmingham, Alabama; Oakland, California; Chicago, Illinois and Minneapolis, Minnesota). Participants were balanced by age, sex, race, and education at baseline. The institutional review boards at all the study sites approved the study protocol, and written informed consent was obtained from all study participants.

Our study included 2971 non-pregnant CARDIA women and men with fibrinogen measurements at examination years 7 (Y7 – our study baseline) and 20 (Y20 – termed followup in our study). Persons with coronary heart disease [CHD] (n=6), persons with non-fasting glucose and missing data for triglycerides and low density lipoprotein (LDL) cholesterol (n=312), persons with missing changes in alcohol use status (n=28), and persons missing other covariates of interest (n=105) were excluded. The final cohort for analysis included 2520 non-pregnant women and men.

**Covariates ascertainment:** Blood pressure, cholesterol, height, weight, waist circumference, smoking, and physical activity were measured in each examination using a standardized protocol.<sup>18</sup> Interviewer-administered questionnaires were used to obtain information on age, race, socioeconomic measures, diabetes history, cigarette smoking status, family history and medication use.<sup>(15)</sup>

**Alcohol consumption:** Alcohol use was assessed via interviewer-administered questionnaire for different types of alcoholic beverages (wine, beer, and liquor). Current alcohol drinkers were defined as individuals who drank any alcoholic beverages in the past year. Otherwise, individuals were classified as non-drinkers.

1  
2  
3  
4  
5  
6  
7  
8  
9  
10  
11  
12  
13  
14  
15  
16  
17  
18  
19  
20  
21  
22  
23  
24  
25  
26  
27  
28  
29  
30  
31  
32  
33  
34  
35  
36  
37  
38  
39  
40  
41  
42  
43  
44  
45  
46  
47  
48  
49  
50  
51  
52  
53  
54  
55  
56  
57  
58  
59  
60

Change in alcohol consumption status over 13 years was categorized according to dichotomized alcohol consumption groupings (non-drinker, current drinker) at Y7 and Y20 and four mutually exclusive groups to reflect long-term changes in alcohol consumption status were defined: continued non-drinker (individuals persistently in the “non-drinker” category at both Y7 and Y20, referent), became drinker (individuals in the “non-drinker” category at Y7 but in the “current” category at Y20), stayed drinker (individuals persistently in the “current” category at both Y7 and Y20), and quit drinking (individuals in the “current” category at Y7 but in the “non-drinker” category in Y20).

We used categorized change in alcohol use rather than a numeric value of change in alcohol consumption over time for 2 reasons: first, per the U.S. Department of Health and Human Services, alcohol use was categorized as none, moderate, and at-risk based on established thresholds; second, the distribution of changes in alcohol use (as numeric values) over time in the general population is skewed and not normally distributed. As such, changes in alcohol use cannot be analyzed using parametric statistical tests.

**Fibrinogen measurement:** Each participant had blood samples drawn after an 8-hour fast, between 7 a.m. and 10 a.m. Within 10 minutes of collection, repeated inversion was used to mix the samples, which were then spun in a refrigerated centrifuge at 4°C for 20 minutes. Within 90 minutes, the samples were stored at -70°C for a maximum of 4 months. Fibrinogen was measured in Y7 and Y20 plasma samples as previously described, using the BNII Nephelometer 100 Analyzer, Dade Behring, Deerfield, IL, USA (16). The assay was calibrated with a reference plasma of known fibrinogen concentration, and the intra-assay and inter-assay coefficient of variation were 2.7% and 2.6% at Y7 and 3.1% and 4.2% at Y20.

**Statistical analysis:** All analyses were performed by sex/race strata, with 2-sided  $p < 0.05$  considered statistically significant. Baseline and follow-up alcohol consumption status and pairwise differences in covariates by sex/race groups were estimated using t-tests, chi-square tests, and Fisher’s exact tests, as

1  
2  
3 appropriate. ANCOVA models were used to relate changes in status of alcohol use (predictor variable)  
4  
5 to changes in mean fibrinogen levels (outcome variable) over 13 years, with adjustments for covariates.  
6  
7  
8 Model 1 adjusted for baseline (Y7) age and fibrinogen level. Model 2 adjusted for baseline age,  
9  
10 fibrinogen level, family history of heart disease, education, physical activity and traditional CVD risk  
11  
12 factors (including hypertension, diabetes, dyslipidemia, hypertriglyceridemia, obesity and number of  
13  
14 cigarettes/day); 13-year change in physical activity score, as well as follow-up statuses of traditional CVD  
15  
16 risk factors as listed. We stratified our findings by sex/race groups because the CARDIA study group was  
17  
18 designed to be balanced by age, sex, race and education when recruited at baseline. Analyses were  
19  
20 conducted with SAS statistical software version 9.2 (SAS Institute Inc, Cary, NC).  
21  
22  
23  
24  
25  
26  
27  
28  
29  
30  
31  
32  
33  
34  
35  
36  
37  
38  
39  
40  
41  
42  
43  
44  
45  
46  
47  
48  
49  
50  
51  
52  
53  
54  
55  
56  
57  
58  
59  
60

## RESULTS

**Baseline Characteristics:** Baseline characteristics for this sample have previously been described. In brief, we included 2520 participants (55% women, 43% black), mean age of 32.2 years (range 25-37 years) at study baseline. Supplemental Table 1 shows summary statistics for key variables at baseline and follow-up. Over 13 years, mean fibrinogen increased by 71mg/dL vs. 70mg/dL ( $p=NS$ ) in black men compared with white men, and 78mg/dL vs. 68mg/dL ( $p<0.05$ ) in black women compared with white women, respectively.

The prevalence of alcohol use at baseline and year 20 was higher among white men and women relative to black men and women (both  $p<0.01$ ). Compared to study baseline, the prevalence of alcohol use at Y20 was higher among white men and women, but lower among black men and women by follow-up 13 years later (Supplemental Table 1).

**Multivariable Changes in Fibrinogen Levels in Relation to Changes in Alcohol Consumption Status:** The alcohol drinking status for most participants remained stable through the years. More individuals remained non-drinker ( $N = 829$ ) or stayed drinker ( $N = 1088$ ), while fewer persons changed their drinking status through the years ( $N = 309$  for those who became drinker, and 294 for those who quit drinking). After adjustments for various covariates (models 1 and 2 in Figure), changes in alcohol consumption status from study baseline to follow-up were inversely associated with changes in mean fibrinogen levels during the same time period. As such, becoming or staying a drinker (for both models) was associated with smaller mean increase in 13-year follow-up fibrinogen levels compared with never-drinkers. This held true among black men and women, but was particularly strongest in white women (all  $p<0.001$  for both models among white women). An exception was white men, whose fibrinogen

1  
2  
3 increased more in those who became or stayed drinkers and increased the least among those who never  
4  
5 drank alcohol over the 13 years.  
6  
7

8 For all alcohol use patterns studied, quitting alcohol use was associated with the *largest* mean  
9  
10 increase in fibrinogen by the 13-year follow-up ( $p < 0.001$  for white men, compared with never-drinkers).  
11  
12 For black women, change in fibrinogen was essentially the same for those who quit drinking relative to  
13  
14 those who never drank alcohol over the years.  
15  
16

17 Our findings remained the same when at-risk drinkers – defined as  $\geq 3$  drinks on the day of  
18  
19 maximum intake in the past month or  $\geq 8$  drinks per week for women; and  $\geq 4$  drinks on the day they  
20  
21 drank the most in the past month or  $\geq 15$  drinks per week for men(17) – were excluded from the analysis  
22  
23 (data not shown). Our findings also did not change when follow-up CVD risk factors were excluded from  
24  
25 Model 2. Furthermore, the change in fibrinogen levels among participants who became or stayed  
26  
27 drinker through the years remained significantly lower compared with the change among those who  
28  
29 quit drinking – used as the referent group in this case (data not shown).  
30  
31  
32  
33

34 The health characteristics of the participants by alcohol consumption category are shown in  
35  
36 Table 1. The unadjusted data show that at baseline (Y7), the continued non-drinker population and  
37  
38 those who quit drinking had significantly higher prevalence of high blood pressure – which increased  
39  
40 and remained significant by Y20 – compared with those who became or stayed drinker . Those who quit  
41  
42 drinking had a significantly lower prevalence of diabetes at baseline, which increased (but not  
43  
44 significantly) by followup at Y20. Interestingly, other assessed characteristics (including liver disease,  
45  
46 hepatitis, digestive disease and cancer) were not significantly different among the alcohol consumption  
47  
48 groups.  
49  
50  
51

## 52 **DISCUSSION**

53  
54  
55  
56  
57  
58  
59  
60

1  
2  
3 We directly examined associations between changes in long-term alcohol consumption and  
4 alcohol cessation, and changes in fibrinogen levels in a large, young population of black and white men  
5 and women. Overall we observed that fibrinogen rose less in persons who became drinkers or remained  
6 drinkers, and interestingly, increased more in persons who quit drinking. This pattern held for three of  
7 the sex/race groups in our study, even after adjusting for study baseline age, fibrinogen levels, family  
8 history of heart disease, education, physical activity and traditional CVD risk factors; 13-year changes in  
9 physical activity, as well as follow-up statuses of traditional CVD risk factors (as detailed in model 2 in  
10 the Figure). However, for white men, continued non-drinker status was not associated with a greater  
11 rise in fibrinogen.  
12  
13  
14  
15  
16  
17  
18  
19  
20  
21  
22  
23

24  
25 Fibrinogen is mainly synthesized in the liver, and is a soluble glycoprotein which regulates  
26 plasma viscosity, induces reversible red cell aggregation and is the most abundant component of  
27 thrombi.(18, 19) In addition, fibrinogen increases platelet reactivity by binding glycoprotein IIb/IIIa  
28 receptor on the platelet surface.(18) Fibrin is an important component of atherogenesis and atheroma  
29 growth, and additionally provides a scaffold for smooth muscle cell proliferation and migration which  
30 attracts leukocytes, affecting endothelial permeability and vascular tone.(18, 20) Fibrinogen binds LDL  
31 cholesterol and lipids, and is consequently involved in the formation of the atherosclerotic lipid  
32 core.(18) Moderate alcohol consumption has beneficial effects on atherosclerosis, attributed to its anti-  
33 inflammatory and antioxidant effects, and to its actions on vascular function. These effects are thought  
34 to be mediated by polyphenols(21)  
35  
36  
37  
38  
39  
40  
41  
42  
43  
44  
45  
46  
47

48 Fibrinogen has shown significant independent positive associations with CHD, CVD and their risk  
49 factors – including age, smoking history, physical activity, body mass index, total and LDL cholesterol and  
50 systolic blood pressure,(4) (5) while the opposite is true for alcohol consumption. In fact, alcohol  
51 consumed in moderate quantities is inversely correlated with risk factors and mortality for CHD and CVD  
52 (including stroke).(2, 3)  
53  
54  
55  
56  
57  
58  
59  
60



1  
2  
3 We found that overall, persons who continued to use and those who initiated alcohol  
4 consumption during the 13 years of follow-up had smaller changes in fibrinogen levels relative to those  
5 who never consumed alcohol. Several prospective and cross-sectional studies have shown significant  
6 inverse associations between alcohol consumption and fibrinogen levels.(4, 6) Indeed, moderate  
7 alcohol consumption has been associated with platelet inhibition similar to that observed with aspirin  
8 use.(22) However, while some studies have examined the relationship between *very* short-term alcohol  
9 intake and changes in fibrinogen levels in a limited number of patients,(8, 23) very sparse data exist that  
10 have examined associations between long-term alcohol intake status and variations in fibrinogen levels  
11 in a large population of participants. In addition, the youth of our study population contributes  
12 significant information to existing literature because it evaluates alcohol effects on CVD risk, with  
13 minimal confounding. Our study suggests that moderate alcohol consumption can still modulate CVD  
14 risk even in young adults, an important finding which agrees with benefits to CVD risk modulation  
15 beginning early in life. It also suggests fibrinogen as a possible mediator of this process.  
16  
17  
18  
19  
20  
21  
22  
23  
24  
25  
26  
27  
28  
29  
30  
31  
32

33 An interesting and important observation from our study is that in all sex/race groups, among  
34 those who quit drinking over the years, fibrinogen levels increased to values higher than observed for  
35 never-drinkers and the rest of the drinking groups. Indeed, several studies have observed a J-shaped  
36 curve in the relationship between alcohol and CVD such that lower alcohol consumption was associated  
37 with reduced CVD, while the reverse was true for higher quantities of alcohol consumed.(1, 2, 24) A  
38 study of patients immediately post MI showed better health among patients with moderately increased  
39 alcohol intake relative to quitters.(13) Nonetheless, no study to our knowledge has investigated the  
40 effects of quitting alcohol consumption on inflammatory/thrombotic markers or CVD risk factors in  
41 general. Fibrinogen is a marker of platelet aggregation and vascular thrombosis. In acute, short-term  
42 human and experimental models, discontinuation of alcohol use has been associated with rebound  
43 platelet aggregation.(14, 22, 25)  
44  
45  
46  
47  
48  
49  
50  
51  
52  
53  
54  
55  
56  
57  
58  
59  
60

1  
2  
3 Unlike the rest of the sex/race groups, white men who became drinkers and those who stayed  
4  
5 drinkers through the years had larger increases in fibrinogen levels relative to never-drinkers.  
6  
7 Prospective and cross-sectional studies have shown the observed J-curve pattern to beneficial effects of  
8  
9 alcohol in whites, but not in blacks; and moderate alcohol drinking to be associated with reduced CVD  
10  
11 mortality in whites, but not blacks.(26, 27) This finding in our study is unexplained, and requires further  
12  
13 exploration. The strength of our study lies in the longitudinal nature of our assessment with a relatively  
14  
15 long follow-up period of 13 years, the large size of the study, the youth of the study participants (with  
16  
17 few residual confounding factors at baseline), and the sex/racial makeup of the cohort. Our study  
18  
19 findings are particularly novel in that in examining the associations between alcohol consumption and  
20  
21 fibrinogen changes in a large population of black and white men and women, we consolidated many  
22  
23 years of alcohol use into each of the alcohol status categories; while examining their effects on  
24  
25 variations in fibrinogen levels within each group. Thus, our study provides an important addition to the  
26  
27 literature with respect to the long-term relationship between alcohol use and fibrinogen as a marker of  
28  
29 CVD.  
30  
31  
32  
33  
34  
35

36 Limitations include the relatively wide range of alcohol intake levels included among persons  
37  
38 classified as drinkers. Nonetheless, our findings remained the same after dropping at-risk levels. We  
39  
40 caution that this analysis does not specifically measure all other potential conditions associated with  
41  
42 elevated fibrinogen levels, although on average the CARDIA cohort was recruited to be a relatively  
43  
44 healthy sample at baseline. Furthermore, some participants were excluded from our analysis due to  
45  
46 missing data or loss to follow-up. Findings were unchanged when imputation analysis was performed in  
47  
48 a prior study by our group which examined associations between fibrinogen and CV risk factors in the  
49  
50 same population.  
51  
52  
53  
54  
55  
56  
57  
58  
59  
60

1  
2  
3 **Conclusion:** In this young cohort of black and white men and women with minimal baseline  
4  
5 confounding factors, increase in fibrinogen was overall smaller among drinkers and larger among those  
6  
7 who quit drinking, compared with those who remained alcohol-free for 13 years. These results need to  
8  
9 be confirmed in other populations. Our study provides insight into the mechanism and possible role of  
10  
11 fibrinogen on the established protective effect of moderate alcohol intake on CVD outcomes, and  
12  
13 concurs with benefits to CVD risk modulation beginning early in life. Translation of our findings to  
14  
15 associations with CHD/CVD events would be of great interest.  
16  
17  
18  
19  
20  
21  
22

### 23 **Sources of Funding and Acknowledgements**

24  
25 This work was supported by grant HL-43758 and contracts NO1-HC-48049 and NO1-HC-95095 from the  
26  
27 National Heart, Lung, and Blood Institute (NHLBI) and grant AG032136 from the National Institute on  
28  
29 Aging, National Institutes of Health. The funders had no role in the design and conduct of the study;  
30  
31 collection, management, analysis, and interpretation of the data; and preparation, review, or approval  
32  
33 of the manuscript, except as required of all studies supported by the NHLBI. The authors had full access  
34  
35 to all of the data in the study and take responsibility for the integrity of the data and the accuracy of the  
36  
37 data analysis.  
38  
39  
40  
41  
42

43 **Conflicts of Interest:** None  
44  
45  
46  
47

48 **Data Sharing Statement:** No additional data  
49  
50  
51  
52  
53  
54  
55  
56  
57  
58  
59  
60

## **Bibliography**

1. Costanzo S, Di Castelnuovo A, Donati MB, et al. Alcohol consumption and mortality in patients with cardiovascular disease: a meta-analysis. *J Am Coll Cardiol*. 2010;55(13):1339-47. Epub 2010/03/27.
2. Di Castelnuovo A, Costanzo S, Bagnardi V, et al. Alcohol dosing and total mortality in men and women: an updated meta-analysis of 34 prospective studies. *Arch Intern Med*. 2006;166(22):2437-45. Epub 2006/12/13.
3. Brien SE, Ronksley PE, Turner BJ, et al. Effect of alcohol consumption on biological markers associated with risk of coronary heart disease: systematic review and meta-analysis of interventional studies. *BMJ*. 2011;342:d636. Epub 2011/02/24.
4. Fibrinogen Studies C, Kaptoge S, White IR, et al. Associations of plasma fibrinogen levels with established cardiovascular disease risk factors, inflammatory markers, and other characteristics: individual participant meta-analysis of 154,211 adults in 31 prospective studies: the fibrinogen studies collaboration. *American Journal of Epidemiology*. 2007;166(8):867-79.
5. Fibrinogen Studies C, Danesh J, Lewington S, et al. Plasma fibrinogen level and the risk of major cardiovascular diseases and nonvascular mortality: an individual participant meta-analysis.[Erratum appears in *JAMA*. 2005 Dec 14;294(22):2848]. *JAMA*. 2005;294(14):1799-809.
6. Rimm EB, Williams P, Fosher K, et al. Moderate alcohol intake and lower risk of coronary heart disease: meta-analysis of effects on lipids and haemostatic factors. *BMJ*. 1999;319(7224):1523-8. Epub 1999/12/11.
7. Chainani-Wu N, Weidner G, Purnell DM, et al. Changes in emerging cardiac biomarkers after an intensive lifestyle intervention. *Am J Cardiol*. 2011;108(4):498-507. Epub 2011/06/01.
8. Hansen AS, Marckmann P, Dragsted LO, et al. Effect of red wine and red grape extract on blood lipids, haemostatic factors, and other risk factors for cardiovascular disease. *European Journal of Clinical Nutrition*. 2005;59(3):449-55. Epub 2005/01/28.
9. Imhof A, Woodward M, Doering A, et al. Overall alcohol intake, beer, wine, and systemic markers of inflammation in western Europe: results from three MONICA samples (Augsburg, Glasgow, Lille). *European Heart Journal*. 2004;25(23):2092-100. Epub 2004/12/02.
10. Kloner RA, Rezkalla SH. To drink or not to drink? That is the question. *Circulation*. 2007;116(11):1306-17. Epub 2007/09/12.
11. Sesso HD, Stampfer MJ, Rosner B, et al. Seven-year changes in alcohol consumption and subsequent risk of cardiovascular disease in men. *Arch Intern Med*. 2000;160(17):2605-12. Epub 2000/09/22.
12. Joosten MM, Chiuve SE, Mukamal KJ, et al. Changes in alcohol consumption and subsequent risk of type 2 diabetes in men. *Diabetes*. 2011;60(1):74-9. Epub 2010/09/30.
13. Carter MD, Lee JH, Buchanan DM, et al. Comparison of outcomes among moderate alcohol drinkers before acute myocardial infarction to effect of continued versus discontinuing alcohol intake after the infarct. *Am J Cardiol*. 2010;105(12):1651-4. Epub 2010/06/12.
14. Puddey IB, Rakic V, Dimmitt SB, et al. Influence of pattern of drinking on cardiovascular disease and cardiovascular risk factors--a review. *Addiction*. 1999;94(5):649-63. Epub 1999/11/24.
15. Friedman GD, Cutter GR, Donahue RP, et al. CARDIA: study design, recruitment, and some characteristics of the examined subjects. *J Clin Epidemiol*. 1988;41(11):1105-16. Epub 1988/01/01.
16. Reiner AP, Carty CL, Carlson CS, et al. Association between patterns of nucleotide variation across the three fibrinogen genes and plasma fibrinogen levels: the Coronary Artery Risk Development in Young Adults (CARDIA) study. *Journal of thrombosis and haemostasis : JTH*. 2006;4(6):1279-87. Epub 2006/05/19.
17. Helping Patients Who Drink Too Much: A Clinician's Guide. In: Services USDoHaH, editor. Rockville, MD2005.

- 1  
2  
3 18. Tousoulis D, Papageorgiou N, Androulakis E, et al. Fibrinogen and cardiovascular disease:  
4 Genetics and biomarkers. *Blood Rev.* 2011. Epub 2011/06/10.  
5  
6 19. Herrick S, Blanc-Brude O, Gray A, et al. *Int J Biochem Cell Biol.* 1999;31(7):741-6. Epub  
7 1999/09/01.  
8 20. Green D, Foiles N, Chan C, et al. Elevated fibrinogen levels and subsequent subclinical  
9 atherosclerosis: the CARDIA Study. *Atherosclerosis.* 2009;202(2):623-31. Epub 2008/07/08.  
10 21. Arranz S, Chiva-Blanch G, Valderas-Martinez P, et al. Wine, beer, alcohol and polyphenols on  
11 cardiovascular disease and cancer. *Nutrients.* 2012;4(7):759-81. Epub 2012/08/02.  
12 22. Renaud SC, Ruf JC. Effects of alcohol on platelet functions. *Clinica chimica acta; international*  
13 *journal of clinical chemistry.* 1996;246(1-2):77-89. Epub 1996/03/15.  
14 23. Dimmitt SB, Rakic V, Puddey IB, et al. The effects of alcohol on coagulation and fibrinolytic  
15 factors: a controlled trial. *Blood Coagul Fibrinolysis.* 1998;9(1):39-45. Epub 1998/06/02.  
16 24. Corrao G, Bagnardi V, Zambon A, et al. A meta-analysis of alcohol consumption and the risk of  
17 15 diseases. *Prev Med.* 2004;38(5):613-9. Epub 2004/04/07.  
18 25. Ruf JC. Alcohol, wine and platelet function. *Biological research.* 2004;37(2):209-15. Epub  
19 2004/10/01.  
20 26. Kerr WC, Greenfield TK, Bond J, et al. Racial and ethnic differences in all-cause mortality risk  
21 according to alcohol consumption patterns in the national alcohol surveys. *American journal of*  
22 *epidemiology.* 2011;174(7):769-78. Epub 2011/08/23.  
23 27. Sempos CT, Rehm J, Wu T, et al. Average volume of alcohol consumption and all-cause mortality  
24 in African Americans: the NHEFS cohort. *Alcoholism, clinical and experimental research.* 2003;27(1):88-  
25 92. Epub 2003/01/25.  
26  
27  
28  
29  
30  
31  
32  
33  
34  
35  
36  
37  
38  
39  
40  
41  
42  
43  
44  
45  
46  
47  
48  
49  
50  
51  
52  
53  
54  
55  
56  
57  
58  
59  
60

1  
2  
3 **Figure Legend: Adjusted Mean Increase in Fibrinogen in Relation to Changes in Alcohol Use**  
4  
5 **over 13 Years by Sex- Race: the CARDIA Study, 1992-2006**  
6  
7  
8  
9  
10  
11  
12  
13  
14  
15  
16  
17  
18  
19  
20  
21  
22  
23  
24  
25  
26  
27  
28  
29  
30  
31  
32  
33  
34  
35  
36  
37  
38  
39  
40  
41  
42  
43  
44  
45  
46  
47  
48  
49  
50  
51  
52  
53  
54  
55  
56  
57  
58  
59  
60

For peer review only

Table 1. Year 7 and 20 Health Characteristics of Participants by Changes in Alcohol Consumption Status

| Comorbidities*          | Year 7                |                |                |               |                      | Year 20               |                |                |               |                      |
|-------------------------|-----------------------|----------------|----------------|---------------|----------------------|-----------------------|----------------|----------------|---------------|----------------------|
|                         | Continued non-drinker | Became drinker | Stayed drinker | Quit drinking | P value <sup>†</sup> | Continued non-drinker | Became drinker | Stayed drinker | Quit drinking | P value <sup>†</sup> |
| High blood pressure (%) | 11.0                  | 5.8            | 7.7            | 10.5          | 0.012                | 27.1                  | 15.2           | 19.3           | 28.9          | <0.001               |
| Stroke or TIA (%)       | --                    | --             | --             | --            | --                   | 0.7                   | 0.6            | 0.6            | 1.7           | 0.318                |
| Diabetes (%)            | 4.7                   | 3.2            | 1.7            | 2.0           | 0.001                | 9.2                   | 5.8            | 5.6            | 9.5           | 0.007                |
| Liver disease (%)       | 1.2                   | 2.6            | 1.3            | 1.0           | 0.281                | 1.9                   | 3.6            | 2.1            | 3.7           | 0.161                |
| Hepatitis (%)           | 1.0                   | 2.6            | 1.2            | 1.0           | 0.165                | 1.3                   | 1.9            | 1.4            | 2.4           | 0.421                |
| Digestive disease (%)   | 5.5                   | 7.1            | 4.1            | 6.5           | 0.116                | 7.1                   | 7.4            | 7.2            | 9.5           | 0.554                |
| Cancer (%)              | 2.3                   | 1.6            | 1.9            | 3.1           | 0.591                | 4.5                   | 6.8            | 5.5            | 4.8           | 0.421                |
| Mental disorder (%)     | 4.1                   | 5.8            | 3.9            | 4.1           | 0.500                | 5.8                   | 9.1            | 5.6            | 6.5           | 0.152                |

\*Participants were asked if a physician had previously diagnosed them with the chronic conditions.

<sup>†</sup>Overall P values calculated using  $\chi^2$  test

1  
2  
3  
4  
5  
6  
7  
8  
9  
10  
11  
12  
13  
14  
15  
16  
17  
18  
19  
20  
21  
22  
23  
24  
25  
26  
27  
28  
29  
30  
31  
32  
33  
34  
35  
36  
37  
38  
39  
40  
41  
42  
43  
44  
45  
46  
47  
48  
49

e.

For peer review only



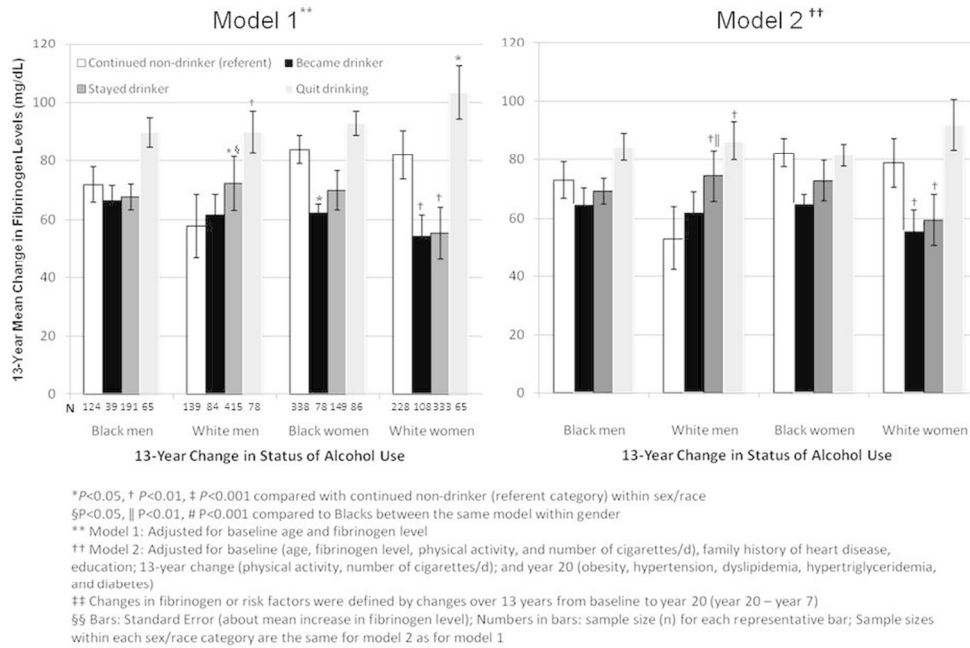

119x90mm (300 x 300 DPI)

Review only

**Supplemental Table 1. Baseline\*\*and Year 20 (Follow-up) Characteristics by Sex- Race: the CARDIA Study, 1992-2006**

| Variables                        | Men           |                | Women         |                |
|----------------------------------|---------------|----------------|---------------|----------------|
|                                  | Black (N=428) | Whites (N=726) | Black (N=656) | Whites (N=738) |
| <b>Baseline (Year 7)</b>         |               |                |               |                |
| Age, y                           | 31.6 (3.7)    | 32.7 (3.3)‡    | 31.6 (3.8)    | 32.7 (3.3)‡    |
| Highest education attained, y    | 14.2 (2.3)    | 16.1 (2.6)‡    | 14.6 (2.1)    | 16.2 (2.4)‡    |
| Family history of CVD, %         | 39.7          | 32.0†          | 43.3          | 33.3‡          |
| Diastolic BP, mmHg               | 72.3 (9.8)    | 70.3 (9.0)‡    | 69.9 (10.3)   | 64.8 (8.0)‡    |
| LDL cholesterol, mg/dL           | 111.8 (35.6)  | 113.7 (32.4)   | 104.5 (29.3)  | 101.9 (27.6)   |
| HDL cholesterol, mg/dL           | 50.8 (14.2)   | 45.7 (10.9)‡   | 55.1 (13.7)   | 56.5 (12.5)*   |
| Glucose, <i>ug</i> /dL           | 94.1 (22.7)   | 93.3 (10.8)    | 89.1 (15.3)   | 88.4 (10.2)    |
| Triglycerides, mg/dL             | 81.6 (51.4)   | 97.2 (59.3)‡   | 67.0 (37.8)   | 69.7 (39.1)    |
| Physical activity, exercise unit | 477.6 (345.1) | 414.2 (263.5)‡ | 231.5 (215.7) | 309.5 (229.2)‡ |
| BMI, kg/m <sup>2</sup>           | 27.1 (5.2)    | 25.8 (4.0)‡    | 28.7 (7.3)    | 24.4 (5.1)‡    |
| Fibrinogen, mg/dL                | 328.3 (72.7)  | 305.1 (56.8)‡  | 371.0 (80.9)  | 324.5 (67.0)‡  |
| Current alcohol use, %           | 61.4          | 68.9†          | 36.3          | 54.2‡          |
| Antihypertensive medication, %   | 2.1           | 1.1            | 2.9           | 0.4‡           |

| Variables                      | Men           |                | Women         |                |
|--------------------------------|---------------|----------------|---------------|----------------|
|                                | Black (N=428) | Whites (N=726) | Black (N=656) | Whites (N=738) |
| Lipid-lowering medication, %   | 0.2           | 0.0            | 0.3           | 0.5            |
| Current smoking, %             | 31.5          | 18.2‡          | 25.6          | 15.7‡          |
| Obesity, %                     | 24.1          | 12.8‡          | 36.9          | 12.7‡          |
| Hypertension, %                | 6.1           | 4.1            | 6.7           | 0.8‡           |
| Diabetes, %                    | 1.6           | 0.7            | 1.1           | 0.5            |
| Hypertriglyceridemia, %        | 4.0           | 6.5            | 0.9           | 1.4            |
| Dyslipidemia, %                | 39.9          | 46.6*          | 46.8          | 39.6†          |
| <b>Year 20</b>                 |               |                |               |                |
| Current alcohol use, %         | 54.9          | 69.7‡          | 34.9          | 60.1‡          |
| Antihypertensive medication, % | 19.2          | 11.7‡          | 28.5          | 6.4‡           |
| Lipid-lowering medication, %   | 7.9           | 13.4†          | 5.5           | 4.2            |
| Current smoking, %             | 27.1          | 13.9‡          | 20.0          | 11.1‡          |
| Obesity, %                     | 43.9          | 26.3‡          | 57.8          | 24.9‡          |
| Hypertension, %                | 25.0          | 14.9‡          | 34.9          | 8.3‡           |
| Diabetes, %                    | 10.5          | 4.4‡           | 10.1          | 2.6‡           |
| Hypertriglyceridemia, %        | 6.8           | 16.8‡          | 2.9           | 5.0*           |
| Dyslipidemia, %                | 52.8          | 58.5           | 48.3          | 37.3‡          |

| Variables                                 | Men           |                | Women         |                |
|-------------------------------------------|---------------|----------------|---------------|----------------|
|                                           | Black (N=428) | Whites (N=726) | Black (N=656) | Whites (N=738) |
| <b>13-y Difference (year 20 – year 7)</b> |               |                |               |                |
| Diastolic BP, mmHg                        | 3.0 (11.7)    | 0.8 (9.4)‡     | 5.6 (12.3)    | 2.4 (9.1)‡     |
| LDL cholesterol, mg/dL                    | 0.1 (33.1)    | 1.1 (32.2)     | 3.3 (25.9)    | 4.3 (24.7)     |
| HDL cholesterol, mg/dL                    | -1.1 (11.3)   | 1.0 (9.8)‡     | 2.1 (12.0)    | 5.1 (12.3)‡    |
| Glucose, $\mu$ g/dL                       | 9.6 (29.5)    | 7.6 (16.9)     | 11.3 (26.6)   | 5.1 (13.7)‡    |
| Triglycerides, mg/dL                      | 24.1 (57.4)   | 29.9 (63.3)    | 21.8 (42.7)   | 24.9 (48.0)    |
| Physical activity, exercise unit          | -51.5 (345.2) | -1.3 (260.1)†  | -9.9 (248.4)  | 27.1 (235.9)†  |
| BMI, kg/m <sup>2</sup>                    | 2.9 (3.6)     | 2.5 (4.9)      | 3.8 (4.5)     | 2.7 (4.1)‡     |
| Fibrinogen, mg/dL                         | 71.0 (71.2)   | 69.5 (67.8)    | 78.1 (86.2)   | 67.8 (77.1)*   |

\* $P < 0.05$ , † $P < 0.01$ , ‡ $P < 0.001$  compared with blacks between the value of the characteristic within gender.

§ Data are given as means (SD) unless otherwise specified.

|| Abbreviations: CVD, cardiovascular disease (included heart attack and stroke); BP, blood pressure; HDL, high-density lipoprotein; LDL, low-density lipoprotein; BMI, body mass index

# Definitions: Current smoking - at least 5 cigarettes per week almost every week for at least 3 months, Diabetes - fasting glucose  $\geq 126$  mg/dL or taking diabetic medication; hypertension - systolic blood pressure  $\geq 140$  mmHg, diastolic blood pressure (DBP)  $\geq 90$  mmHg, or taking anti-hypertensive medication; dyslipidemia - low HDL cholesterol ( $< 40$  mg/dL [men] or  $< 50$  mg/dL [women]) and/or high LDL cholesterol ( $> 130$  mg/dL) or taking lipid-lowering medication, hypertriglyceridemia - triglycerides  $> 200$  mg/dL; obesity was defined as BMI  $\geq 30$  kg/m<sup>2</sup>.

\*\* Baseline refers to year 7 of the CARDIA cohort

STROBE Statement—Checklist of items that should be included in reports of *cohort studies*

|                              | Item No | Recommendation                                                                                                                                                                                                                                                                                                                                                                                                |
|------------------------------|---------|---------------------------------------------------------------------------------------------------------------------------------------------------------------------------------------------------------------------------------------------------------------------------------------------------------------------------------------------------------------------------------------------------------------|
| <b>Title and abstract</b>    | 1       | (a) Indicate the study's design with a commonly used term in the title or the abstract<br>(b) Provide in the abstract an informative and balanced summary of what was done and what was found                                                                                                                                                                                                                 |
| <b>Introduction</b>          |         |                                                                                                                                                                                                                                                                                                                                                                                                               |
| Background/rationale         | 2       | Explain the scientific background and rationale for the investigation being reported                                                                                                                                                                                                                                                                                                                          |
| Objectives                   | 3       | State specific objectives, including any prespecified hypotheses                                                                                                                                                                                                                                                                                                                                              |
| <b>Methods</b>               |         |                                                                                                                                                                                                                                                                                                                                                                                                               |
| Study design                 | 4       | Present key elements of study design early in the paper                                                                                                                                                                                                                                                                                                                                                       |
| Setting                      | 5       | Describe the setting, locations, and relevant dates, including periods of recruitment, exposure, follow-up, and data collection                                                                                                                                                                                                                                                                               |
| Participants                 | 6       | (a) Give the eligibility criteria, and the sources and methods of selection of participants. Describe methods of follow-up<br>(b) For matched studies, give matching criteria and number of exposed and unexposed                                                                                                                                                                                             |
| Variables                    | 7       | Clearly define all outcomes, exposures, predictors, potential confounders, and effect modifiers. Give diagnostic criteria, if applicable                                                                                                                                                                                                                                                                      |
| Data sources/<br>measurement | 8*      | For each variable of interest, give sources of data and details of methods of assessment (measurement). Describe comparability of assessment methods if there is more than one group                                                                                                                                                                                                                          |
| Bias                         | 9       | Describe any efforts to address potential sources of bias                                                                                                                                                                                                                                                                                                                                                     |
| Study size                   | 10      | Explain how the study size was arrived at                                                                                                                                                                                                                                                                                                                                                                     |
| Quantitative variables       | 11      | Explain how quantitative variables were handled in the analyses. If applicable, describe which groupings were chosen and why                                                                                                                                                                                                                                                                                  |
| Statistical methods          | 12      | (a) Describe all statistical methods, including those used to control for confounding<br>(b) Describe any methods used to examine subgroups and interactions<br>(c) Explain how missing data were addressed<br>(d) If applicable, explain how loss to follow-up was addressed<br>(e) Describe any sensitivity analyses                                                                                        |
| <b>Results</b>               |         |                                                                                                                                                                                                                                                                                                                                                                                                               |
| Participants                 | 13*     | (a) Report numbers of individuals at each stage of study—eg numbers potentially eligible, examined for eligibility, confirmed eligible, included in the study, completing follow-up, and analysed<br>(b) Give reasons for non-participation at each stage<br>(c) Consider use of a flow diagram                                                                                                               |
| Descriptive data             | 14*     | (a) Give characteristics of study participants (eg demographic, clinical, social) and information on exposures and potential confounders<br>(b) Indicate number of participants with missing data for each variable of interest<br>(c) Summarise follow-up time (eg, average and total amount)                                                                                                                |
| Outcome data                 | 15*     | Report numbers of outcome events or summary measures over time                                                                                                                                                                                                                                                                                                                                                |
| Main results                 | 16      | (a) Give unadjusted estimates and, if applicable, confounder-adjusted estimates and their precision (eg, 95% confidence interval). Make clear which confounders were adjusted for and why they were included<br>(b) Report category boundaries when continuous variables were categorized<br>(c) If relevant, consider translating estimates of relative risk into absolute risk for a meaningful time period |

|                          |    |                                                                                                                                                                            |
|--------------------------|----|----------------------------------------------------------------------------------------------------------------------------------------------------------------------------|
| Other analyses           | 17 | Report other analyses done—eg analyses of subgroups and interactions, and sensitivity analyses                                                                             |
| <b>Discussion</b>        |    |                                                                                                                                                                            |
| Key results              | 18 | Summarise key results with reference to study objectives                                                                                                                   |
| Limitations              | 19 | Discuss limitations of the study, taking into account sources of potential bias or imprecision. Discuss both direction and magnitude of any potential bias                 |
| Interpretation           | 20 | Give a cautious overall interpretation of results considering objectives, limitations, multiplicity of analyses, results from similar studies, and other relevant evidence |
| Generalisability         | 21 | Discuss the generalisability (external validity) of the study results                                                                                                      |
| <b>Other information</b> |    |                                                                                                                                                                            |
| Funding                  | 22 | Give the source of funding and the role of the funders for the present study and, if applicable, for the original study on which the present article is based              |

\*Give information separately for exposed and unexposed groups.

**Note:** An Explanation and Elaboration article discusses each checklist item and gives methodological background and published examples of transparent reporting. The STROBE checklist is best used in conjunction with this article (freely available on the Web sites of PLoS Medicine at <http://www.plosmedicine.org/>, Annals of Internal Medicine at <http://www.annals.org/>, and Epidemiology at <http://www.epidem.com/>). Information on the STROBE Initiative is available at <http://www.strobe-statement.org>.
